# Supplementary material for: Differences in meiofauna communities with sediment depth are greater than habitat effects on the New Zealand continental margin: implications for vulnerability to anthropogenic disturbance
Source: PeerJ. 2016 Jul 5;4:e2154. doi: 10.7717/peerj.2154 (PMC4941793; doi:10.7717/peerj.2154)
Supplement: Supplemental Information 8 — Data used for PERMANOVA analysis on community attributes between Hikurangi Margin and Bay of Plenty. [file peerj-04-2154-s008.xlsx]

## Sheet: Region PERMANOVA
	Nematoda	Nauplii	Copepoda	Ostracoda	Annelida	Kinorhyncha	Isopoda	Tanaidacea	Amphipoda	Cumacea	Aplacophora	Bivalvia	Gastrotricha	Tardigrada	Loricifera		Habitat	Water depth	Strata	Core	Region
4_4	752	34	86	2	18	13	0	0	1	0	0	0	0	0	0		Slope	1046	b	1	Hikurangi margin
4_5	791	61	77	7	11	10	2	1	0	0	0	0	0	0	0		Slope	1046	b	2	Hikurangi margin
4_7	833	77	89	5	16	7	1	0	0	0	0	0	0	0	0		Slope	1046	b	3	Hikurangi margin
10_6	643	29	45	5	9	2	0	0	0	0	0	0	0	0	0		Slope	1562	d	1	Hikurangi margin
10_8	528	39	44	1	4	4	2	0	0	0	0	0	0	0	0		Slope	1564	d	2	Hikurangi margin
12_3	741	87	155	10	41	6	1	2	0	0	0	5	0	0	0		Canyon	1350	d	1	Hikurangi margin
12_4	664	37	55	0	24	1	0	2	0	0	0	0	0	0	0		Canyon	1350	d	2	Hikurangi margin
12_8	575	96	99	5	14	11	1	4	2	6	0	0	0	0	0		Canyon	1350	d	3	Hikurangi margin
17_3	527	57	48	0	6	1	0	0	0	0	0	0	0	0	0		Slope	1514	d	1	Hikurangi margin
17_8	467	20	28	3	5	1	2	1	1	0	0	0	0	0	0		Slope	1514	d	2	Hikurangi margin
19_3	478	58	73	3	11	0	0	7	0	0	0	0	0	0	0		Slope	1553	d	1	Hikurangi margin
22_1	703	86	59	8	19	4	0	1	0	0	0	1	0	0	0		Canyon	1188	c	1	Hikurangi margin
22_2	614	24	36	3	12	5	0	0	0	0	0	0	0	0	0		Canyon	1188	c	2	Hikurangi margin
22_5	742	58	61	2	15	9	0	4	0	0	0	0	0	0	0		Canyon	1188	c	3	Hikurangi margin
27_4	858	98	147	15	34	22	0	2	1	0	0	3	0	0	0		Canyon	1013	b	1	Hikurangi margin
27_6	820	77	86	9	15	16	0	3	0	0	0	6	0	0	0		Canyon	1013	b	2	Hikurangi margin
27_8	1117	86	147	8	25	30	0	1	1	0	0	5	0	0	0		Canyon	1013	b	3	Hikurangi margin
31_1	817	32	38	7	27	7	0	0	1	0	0	0	0	0	0		Canyon	730	a	1	Hikurangi margin
31_2	1198	64	78	7	34	15	0	0	0	0	0	0	0	0	0		Canyon	730	a	2	Hikurangi margin
31_3	1321	24	38	5	36	9	0	1	0	0	0	0	0	0	0		Canyon	730	a	3	Hikurangi margin
38_2	867	78	116	11	18	9	4	1	1	1	0	0	0	0	0		Slope	1121	c	1	Hikurangi margin
38_3	622	87	90	5	14	9	0	1	0	0	0	0	0	0	0		Slope	1121	c	2	Hikurangi margin
38_4	274	32	36	0	2	1	0	0	0	0	0	0	0	0	0		Slope	1121	c	3	Hikurangi margin
41_1	343	5	11	0	1	2	0	0	0	0	0	0	0	0	0		Slope	942	b	1	Hikurangi margin
41_3	495	30	32	1	8	6	0	0	0	0	0	0	0	0	0		Slope	942	b	2	Hikurangi margin
41_8	571	26	37	5	5	3	0	2	0	0	0	0	0	0	0		Slope	942	b	3	Hikurangi margin
44_4	737	16	39	0	8	1	0	2	0	0	0	0	0	0	0		Slope	728	a	1	Hikurangi margin
44_5	464	20	79	2	4	4	0	0	2	0	0	0	0	0	0		Slope	728	a	2	Hikurangi margin
44_7	664	36	100	0	16	10	1	0	3	0	0	0	0	0	0		Slope	728	a	3	Hikurangi margin
53_3	313	9	23	0	5	1	0	0	0	0	2	0	0	0	0		Canyon	948	b	1	Hikurangi margin
58_3	1163	78	104	1	19	23	1	2	2	0	0	0	0	0	0		Canyon	670	a	1	Hikurangi margin
58_6	1295	27	51	3	15	5	1	1	0	0	0	0	0	0	0		Canyon	670	a	2	Hikurangi margin
58_7	1069	41	95	0	17	15	0	2	3	1	0	0	0	0	0		Canyon	670	a	3	Hikurangi margin
62_6	510	26	61	0	26	7	0	0	0	0	0	0	0	0	0		Canyon	1171	b	1	Hikurangi margin
62_7	680	60	86	4	21	15	1	1	0	0	0	0	0	0	0		Canyon	1171	b	2	Hikurangi margin
62_8	361	12	52	6	13	3	0	1	0	0	0	0	0	0	0		Canyon	1171	b	3	Hikurangi margin
69_1	515	40	46	2	12	10	0	1	1	0	0	0	0	0	0		Seamount	670	a	1	Hikurangi margin
69_2	398	7	16	0	15	0	0	0	0	0	0	0	0	0	0		Seamount	670	a	2	Hikurangi margin
69_5	579	28	57	0	9	6	0	1	0	0	0	0	0	0	0		Seamount	670	a	3	Hikurangi margin
72_1	416	20	43	0	8	3	0	1	0	0	0	0	0	0	0		Seamount	985	b	1	Hikurangi margin
72_4	403	21	42	1	10	6	0	1	1	0	0	0	0	0	0		Seamount	985	b	2	Hikurangi margin
72_8	276	3	18	3	2	3	0	0	0	0	0	0	0	0	0		Seamount	985	b	3	Hikurangi margin
76_4	736	90	136	8	15	12	0	3	0	0	0	0	0	0	0		Slope	1282	b	1	Hikurangi margin
76_5	433	53	99	4	17	12	9	6	0	0	0	1	0	0	0		Slope	1282	b	2	Hikurangi margin
92_2	692	39	40	0	18	0	1	1	0	1	0	0	0	0	0		Canyon	683	a	1	Hikurangi margin
92_4	720	5	55	0	18	1	0	0	0	1	0	0	0	0	0		Canyon	683	a	2	Hikurangi margin
97_1	755	8	36	0	18	2	0	1	0	0	0	1	0	0	0		Canyon	1011	b	1	Hikurangi margin
98_1	659	7	11	0	6	1	0	0	0	0	0	0	0	0	0		Canyon	1012	b	1	Hikurangi margin
98_2	438	2	12	0	7	1	0	1	0	0	0	0	0	0	0		Canyon	1012	b	2	Hikurangi margin
124_4	672	44	50	0	5	10	0	0	0	0	0	0	0	0	0		Slope	690	a	1	Hikurangi margin
124_7	842	34	40	3	10	6	0	0	0	0	0	0	0	0	0		Slope	690	a	2	Hikurangi margin
126_1	846	14	18	1	4	1	0	0	1	0	0	0	0	0	0		Canyon	1495	d	1	Hikurangi margin
126_3	743	28	41	2	12	3	0	2	0	0	0	0	0	0	0		Canyon	1495	d	2	Hikurangi margin
126_6	771	31	37	0	13	10	1	0	0	0	0	0	0	0	0		Canyon	1495	d	3	Hikurangi margin
127_3	689	6	15	1	1	0	0	0	1	0	0	0	0	0	0		Canyon	1177	c	1	Hikurangi margin
128_3	452	28	47	2	15	2	0	3	0	0	0	0	0	0	0		Slope	1420	d	1	Hikurangi margin
129_6	679	15	26	0	15	2	0	2	0	0	0	0	0	0	0		Seamount	1456	d	1	Hikurangi margin
130_4	401	2	15	3	16	5	0	0	1	0	1	0	0	0	0		Seamount	894	b	1	Hikurangi margin
132_1	410	13	25	0	10	7	1	2	0	0	0	0	0	0	0		Seamount	1453	d	1	Hikurangi margin
2_3	298	25	23	1	3	0	0	0	0	0	0	0	0	3	0		Slope	699	a	1	Bay of Plenty
2_4	267	18	22	0	9	3	0	0	0	0	0	0	0	5	0		Slope	699	a	2	Bay of Plenty
2_6	321	6	14	0	6	1	0	0	0	0	0	0	0	0	0		Slope	699	a	3	Bay of Plenty
5_45	297	2	9	0	3	0	0	0	0	0	0	0	0	4	0		Slope	998	b	1	Bay of Plenty
5_47	425	31	27	2	8	0	0	0	0	0	0	0	0	2	0		Slope	998	b	2	Bay of Plenty
5_48	299	19	12	2	3	0	0	0	0	0	0	0	0	1	0		Slope	998	b	3	Bay of Plenty
9_82	370	7	13	0	1	1	0	0	0	0	0	0	0	0	0		Slope	1193	c	1	Bay of Plenty
9_85	280	10	24	1	2	0	0	0	0	0	0	0	0	0	1		Slope	1193	c	2	Bay of Plenty
9_86	379	5	16	0	7	2	0	0	0	0	0	0	0	0	0		Slope	1193	c	3	Bay of Plenty
13_102	351	12	13	0	2	3	0	0	0	0	0	0	0	0	0		Slope	1501	d	1	Bay of Plenty
13_105	225	16	13	0	4	4	0	0	0	0	0	0	0	5	0		Slope	1501	d	2	Bay of Plenty
13_106	233	9	17	0	1	2	0	0	0	0	0	0	0	0	2		Slope	1501	d	3	Bay of Plenty
42_454	457	17	25	0	3	1	0	1	0	0	0	0	0	3	0		Slope	1501	d	1	Bay of Plenty
42_451	298	12	15	0	3	0	0	0	1	0	0	0	0	1	0		Slope	1501	d	2	Bay of Plenty
44_504	265	7	12	0	1	0	0	1	0	0	0	0	0	0	0		Slope	1202	c	1	Bay of Plenty
44_502	332	4	13	1	3	4	0	0	1	0	0	0	0	1	0		Slope	1202	c	2	Bay of Plenty
44_508	275	7	9	1	1	1	0	0	0	0	0	0	0	0	0		Slope	1202	c	3	Bay of Plenty
49_535	409	20	21	2	5	3	0	0	0	0	0	0	0	0	0		Slope	1004	b	1	Bay of Plenty
49_537	287	8	16	0	5	2	0	0	0	0	0	0	0	1	2		Slope	1004	b	2	Bay of Plenty
49_538	417	13	21	1	5	2	0	0	0	0	0	0	0	1	0		Slope	1004	b	3	Bay of Plenty
52_566	600	21	22	10	8	1	1	1	0	0	1	0	1	1	1		Slope	710	a	1	Bay of Plenty
52_567	604	24	33	2	7	2	0	2	0	0	0	0	0	1	0		Slope	710	a	2	Bay of Plenty
52_565	482	7	10	0	3	0	0	0	0	0	0	0	0	1	0		Slope	710	a	3	Bay of Plenty
55_618	890	26	23	2	7	0	1	1	0	0	0	0	1	1	0		Canyon	705	a	1	Bay of Plenty
55_614	399	5	13	0	3	0	0	0	0	0	0	0	0	0	0		Canyon	705	a	2	Bay of Plenty
55_616	653	31	48	3	6	1	0	1	1	0	0	0	0	0	0		Canyon	705	a	3	Bay of Plenty
60_661	257	14	18	0	5	0	2	0	0	0	0	0	0	0	0		Canyon	900	b	1	Bay of Plenty
60_662	491	11	16	0	6	1	1	0	0	0	0	0	0	0	0		Canyon	900	b	2	Bay of Plenty
61_666	652	18	25	2	5	1	0	1	0	0	0	0	0	0	1		Canyon	870	b	1	Bay of Plenty
65_711	524	19	40	0	2	1	0	0	0	0	0	0	0	0	0		Canyon	1254	c	1	Bay of Plenty
66_717	643	8	19	1	4	1	0	2	0	0	0	0	0	0	0		Canyon	1254	c	2	Bay of Plenty
66_719	369	5	5	0	3	0	0	0	0	0	0	0	0	0	0		Canyon	1254	c	3	Bay of Plenty
70_781	539	12	17	0	2	0	0	0	1	0	0	0	0	0	0		Canyon	1518	d	1	Bay of Plenty
70_785	575	1	26	1	3	5	0	0	0	0	0	0	0	0	0		Canyon	1518	d	2	Bay of Plenty
70_787	724	16	17	1	2	1	0	0	0	0	0	0	0	2	0		Canyon	1518	d	3	Bay of Plenty
105_1281	448	10	4	0	8	0	0	0	0	0	0	0	0	0	0		Canyon	1486	d	1	Bay of Plenty
105_1286	511	14	13	0	4	0	1	1	0	0	0	0	0	1	0		Canyon	1486	d	2	Bay of Plenty
105_1287	391	13	19	1	4	2	0	1	0	0	0	0	0	1	0		Canyon	1486	d	3	Bay of Plenty
111_1333	305	6	14	0	2	0	0	0	0	0	1	0	0	0	0		Canyon	1221	c	1	Bay of Plenty
111_1334	540	10	12	2	0	5	1	0	0	0	0	0	0	1	0		Canyon	1221	c	2	Bay of Plenty
113_1341	441	15	22	0	2	2	0	1	0	0	0	0	0	0	0		Canyon	1222	c	1	Bay of Plenty
118_1386	564	24	26	1	4	1	1	1	0	0	0	0	0	2	0		Canyon	1083	b	1	Bay of Plenty
118_1387	1316	23	20	3	10	6	0	0	0	1	0	0	0	1	0		Canyon	1083	b	2	Bay of Plenty
118_1388	920	29	41	2	7	1	0	3	1	0	0	0	0	3	0		Canyon	1083	b	3	Bay of Plenty
125_1467	549	29	27	1	8	0	0	0	0	0	0	0	0	0	0		Canyon	697	a	1	Bay of Plenty
125_1466	276	39	33	4	5	1	0	0	0	0	0	0	0	1	0		Canyon	697	a	2	Bay of Plenty
125_1465	436	32	29	3	6	2	0	0	0	0	1	0	0	5	0		Canyon	697	a	3	Bay of Plenty
135_1555	406	10	9	0	4	3	0	0	0	0	0	0	0	1	0		Canyon	1523	d	1	Bay of Plenty
135_1554	281	5	1	0	4	0	0	2	0	0	0	0	0	1	0		Canyon	1523	d	2	Bay of Plenty
135_1552	230	13	6	1	1	0	0	0	0	0	0	0	0	0	0		Canyon	1523	d	3	Bay of Plenty
142_1591	356	8	15	1	14	0	0	0	0	0	0	0	0	1	0		Canyon	1200	c	1	Bay of Plenty
143_1597	356	19	16	1	4	1	0	0	0	0	0	0	0	3	0		Canyon	1202	c	1	Bay of Plenty
143_1596	437	19	14	0	1	0	2	0	0	0	0	0	0	3	0		Canyon	1202	c	2	Bay of Plenty
150_1692	420	7	16	0	6	0	0	0	1	0	0	0	0	0	0		Canyon	1017	b	1	Bay of Plenty
151_1696	420	16	15	0	7	0	1	0	0	0	0	0	0	0	0		Canyon	1023	b	1	Bay of Plenty
152_1703	1186	0	18	0	8	2	2	1	0	0	0	0	0	0	0		Canyon	1031	b	1	Bay of Plenty
154_1733	204	20	27	1	5	3	1	1	0	0	0	0	0	2	0		Canyon	700	a	1	Bay of Plenty
155_1736	255	13	21	0	7	0	1	0	0	0	0	0	0	0	0		Canyon	704	a	1	Bay of Plenty
155_1738	420	33	33	0	3	4	0	0	0	0	0	0	0	3	0		Canyon	704	a	2	Bay of Plenty
175_1987	521	26	20	1	3	0	0	0	0	0	0	0	0	0	0		Slope	1494	d	1	Bay of Plenty
175_1983	591	29	27	4	5	2	0	1	0	0	0	0	0	0	0		Slope	1494	d	2	Bay of Plenty
175_1981	551	25	37	2	4	2	0	3	1	0	0	0	0	1	0		Slope	1494	d	3	Bay of Plenty
178_2026	336	16	18	0	4	0	0	0	0	0	0	0	0	0	0		Slope	1196	c	1	Bay of Plenty
178_2025	420	38	58	1	1	4	0	2	0	0	0	0	1	0	0		Slope	1196	c	2	Bay of Plenty
178_2027	303	13	30	1	6	0	0	0	0	0	0	0	0	1	0		Slope	1196	c	3	Bay of Plenty
181_2054	329	6	10	1	4	3	1	0	0	0	0	0	0	0	0		Slope	998	b	1	Bay of Plenty
181_2051	392	24	18	0	2	3	0	1	0	0	0	0	0	0	0		Slope	998	b	2	Bay of Plenty
181_2055	411	17	26	1	3	2	0	0	0	0	0	0	0	0	0		Slope	998	b	3	Bay of Plenty
185_2075	317	35	43	2	8	1	0	0	0	0	0	0	0	0	0		Slope	726	a	1	Bay of Plenty
185_2074	435	25	50	0	4	6	1	1	0	0	0	0	0	3	0		Slope	726	a	2	Bay of Plenty
185_2071	542	51	33	0	6	5	1	0	4	0	0	0	0	2	0		Slope	726	a	3	Bay of Plenty
