# Supplementary material for: Differences in meiofauna communities with sediment depth are greater than habitat effects on the New Zealand continental margin: implications for vulnerability to anthropogenic disturbance
Source: PeerJ. 2016 Jul 5;4:e2154. doi: 10.7717/peerj.2154 (PMC4941793; doi:10.7717/peerj.2154)
Supplement: Supplemental Information 9 — Data used for PERMANOVA analysis on community attributes at each region Hikurangi Margin and Bay of Plenty. Data for second stage analysis at Hikurangi Margin sites also included. [file peerj-04-2154-s009.xlsx]

## Sheet: Hikurangi Margin(HIK)-PERMANOVA
Sites	Nematoda	Nauplii	Copepoda	Ostracoda	Annelida	Kinorhyncha	Isopoda	Tanaidacea	Amphipoda	Cumacea	Aplacophora	Bivalvia		Habitat	Water depth	Strata	Core	Sed. depth		Station	Core
4_4_0-1cm	252	33	70	2	9	10	0	0	1	0	0	0		Slope	1046	b	1	0-1cm		4	4
4_4_1-5cm	500	1	16	0	9	3	0	0	0	0	0	0		Slope	1046	b	1	1-5cm		4	4
4_5_0-1cm	240	58	62	7	4	6	1	1	0	0	0	0		Slope	1046	b	2	0-1cm		4	5
4_5_1-5cm	551	3	15	0	7	4	1	0	0	0	0	0		Slope	1046	b	2	1-5cm		4	5
4_7_0-1cm	359	68	61	2	4	3	1	0	0	0	0	0		Slope	1046	b	3	0-1cm		4	7
4_7_1-5cm	474	9	28	3	12	4	0	0	0	0	0	0		Slope	1046	b	3	1-5cm		4	7
10_6_0-1cm	277	20	27	3	4	2	0	0	0	0	0	0		Slope	1561	d	1	0-1cm		10	6
10_6_1-5cm	366	9	18	2	5	0	0	0	0	0	0	0		Slope	1562	d	1	1-5cm		10	6
10_8_0-1cm	218	10	25	0	2	2	0	0	0	0	0	0		Slope	1563	d	2	0-1cm		10	8
10_8_1-5cm	310	29	19	1	2	2	2	0	0	0	0	0		Slope	1564	d	2	1-5cm		10	8
12_3_0-1cm	607	87	151	10	32	5	1	1	0	0	0	5		Canyon	1350	d	1	0-1cm		12	3
12_3_1-5cm	134	0	4	0	9	1	0	1	0	0	0	0		Canyon	1350	d	1	1-5cm		12	3
12_4_0-1cm	429	35	54	0	8	1	0	1	0	0	0	0		Canyon	1350	d	2	0-1cm		12	4
12_4_1-5cm	235	2	1	0	16	0	0	1	0	0	0	0		Canyon	1350	d	2	1-5cm		12	4
12_8_0-1cm	257	68	67	4	9	7	0	2	1	0	0	0		Canyon	1350	d	3	0-1cm		12	8
12_8_1-5cm	318	28	32	1	5	4	1	2	1	6	0	0		Canyon	1350	d	3	1-5cm		12	8
17_3_0-1cm	357	55	43	0	4	1	0	0	0	0	0	0		Slope	1514	d	1	0-1cm		17	3
17_3_1-5cm	170	2	5	0	2	0	0	0	0	0	0	0		Slope	1514	d	1	1-5cm		17	3
17_8_0-1cm	133	19	18	3	1	1	1	1	1	0	0	0		Slope	1514	d	2	0-1cm		17	8
17_8_1-5cm	334	1	10	0	4	0	1	0	0	0	0	0		Slope	1514	d	2	1-5cm		17	8
19_3_0-1cm	278	54	58	3	2	0	0	7	0	0	0	0		Slope	1553	d	1	0-1cm		19	3
19_3_1-5cm	200	4	15	0	9	0	0	0	0	0	0	0		Slope	1553	d	1	1-5cm		19	3
22_1_0-1cm	269	70	47	6	3	4	0	0	0	0	0	0		Canyon	1188	c	1	0-1cm		22	1
22_1_1-5cm	434	16	12	2	16	0	0	1	0	0	0	1		Canyon	1188	c	1	1-5cm		22	1
22_2_0-1cm	270	24	31	2	8	5	0	0	0	0	0	0		Canyon	1188	c	2	0-1cm		22	2
22_2_1-5cm	344	0	5	1	4	0	0	0	0	0	0	0		Canyon	1188	c	2	1-5cm		22	2
22_5_0-1cm	240	48	41	0	9	7	0	2	0	0	0	0		Canyon	1188	c	3	0-1cm		22	5
22_5_1-5cm	502	10	20	2	6	2	0	2	0	0	0	0		Canyon	1188	c	3	1-5cm		22	5
27_4_0-1cm	169	48	65	3	2	15	0	0	0	0	0	1		Canyon	1013	b	1	0-1cm		27	4
27_4_1-5cm	689	50	82	12	32	7	0	2	1	0	0	2		Canyon	1013	b	1	1-5cm		27	4
27_6_0-1cm	377	68	76	9	4	14	0	1	0	0	0	3		Canyon	1013	b	2	0-1cm		27	6
27_6_1-5cm	443	9	10	0	11	2	0	2	0	0	0	3		Canyon	1013	b	2	1-5cm		27	6
27_8_0-1cm	453	84	139	7	9	25	0	1	1	0	0	5		Canyon	1013	b	3	0-1cm		27	8
27_8_1-5cm	664	2	8	1	16	5	0	0	0	0	0	0		Canyon	1013	b	3	1-5cm		27	8
31_1_0-1cm	202	29	29	7	2	3	0	0	1	0	0	0		Canyon	730	a	1	0-1cm		31	1
31_1_1-5cm	615	3	9	0	25	4	0	0	0	0	0	0		Canyon	730	a	1	1-5cm		31	1
31_2_0-1cm	153	25	18	4	4	8	0	0	0	0	0	0		Canyon	730	a	2	0-1cm		31	2
31_2_1-5cm	1045	39	60	3	30	7	0	0	0	0	0	0		Canyon	730	a	2	1-5cm		31	2
31_3_0-1cm	108	6	5	2	2	2	0	0	0	0	0	0		Canyon	730	a	3	0-1cm		31	3
31_3_1-5cm	1213	18	33	3	34	7	0	1	0	0	0	0		Canyon	730	a	3	1-5cm		31	3
38_2_0-1cm	396	74	91	10	10	9	4	1	1	1	0	0		Slope	1121	c	1	0-1cm		38	2
38_2_1-5cm	471	4	25	1	8	0	0	0	0	0	0	0		Slope	1121	c	1	1-5cm		38	2
38_3_0-1cm	197	55	50	3	8	5	0	0	0	0	0	0		Slope	1121	c	2	0-1cm		38	3
38_3_1-5cm	425	32	40	2	6	4	0	1	0	0	0	0		Slope	1121	c	2	1-5cm		38	3
38_4_0-1cm	232	14	14	0	1	0	0	0	0	0	0	0		Slope	1121	c	3	0-1cm		38	4
38_4_1-5cm	42	18	22	0	1	1	0	0	0	0	0	0		Slope	1121	c	3	1-5cm		38	4
41_1_0-1cm	156	4	11	0	1	2	0	0	0	0	0	0		Slope	942	b	1	0-1cm		41	1
41_1_1-5cm	187	1	0	0	0	0	0	0	0	0	0	0		Slope	942	b	1	1-5cm		41	1
41_3_0-1cm	65	5	5	1	0	1	0	0	0	0	0	0		Slope	942	b	2	0-1cm		41	3
41_3_1-5cm	430	25	27	0	8	5	0	0	0	0	0	0		Slope	942	b	2	1-5cm		41	3
41_8_0-1cm	293	24	31	4	3	2	0	1	0	0	0	0		Slope	942	b	3	0-1cm		41	8
41_8_1-5cm	278	2	6	1	2	1	0	1	0	0	0	0		Slope	942	b	3	1-5cm		41	8
44_4_0-1cm	257	13	32	0	3	1	0	2	0	0	0	0		Slope	728	a	1	0-1cm		44	4
44_4_1-5cm	480	3	7	0	5	0	0	0	0	0	0	0		Slope	728	a	1	1-5cm		44	4
44_5_0-1cm	113	8	20	1	1	0	0	0	0	0	0	0		Slope	728	a	2	0-1cm		44	5
44_5_1-5cm	351	12	59	1	3	4	0	0	2	0	0	0		Slope	728	a	2	1-5cm		44	5
44_7_0-1cm	202	24	62	0	7	7	0	0	3	0	0	0		Slope	728	a	3	0-1cm		44	7
44_7_1-5cm	462	12	38	0	9	3	1	0	0	0	0	0		Slope	728	a	3	1-5cm		44	7
53_3_0-1cm	187	8	20	0	3	1	0	0	0	0	2	0		Canyon	948	b	1	0-1cm		53	3
53_3_1-5cm	126	1	3	0	2	0	0	0	0	0	0	0		Canyon	948	b	1	1-5cm		53	3
58_3_0-1cm	173	11	30	1	1	5	0	0	1	0	0	0		Canyon	670	a	1	0-1cm		58	3
58_3_1-5cm	990	67	74	0	18	18	1	2	1	0	0	0		Canyon	670	a	1	1-5cm		58	3
58_6_0-1cm	221	15	30	2	5	2	0	0	0	0	0	0		Canyon	670	a	2	0-1cm		58	6
58_6_1-5cm	1074	12	21	1	10	3	1	1	0	0	0	0		Canyon	670	a	2	1-5cm		58	6
58_7_0-1cm	107	6	11	0	1	3	0	0	0	0	0	0		Canyon	670	a	3	0-1cm		58	7
58_7_1-5cm	962	35	84	0	16	12	0	2	3	1	0	0		Canyon	670	a	3	1-5cm		58	7
62_6_0-1cm	172	13	23	0	9	4	0	0	0	0	0	0		Canyon	1171	b	1	0-1cm		62	6
62_6_1-5cm	338	13	38	0	17	3	0	0	0	0	0	0		Canyon	1171	b	1	1-5cm		62	6
62_7_0-1cm	207	49	71	4	9	7	1	0	0	0	0	0		Canyon	1171	b	2	0-1cm		62	7
62_7_1-5cm	473	11	15	0	12	8	0	1	0	0	0	0		Canyon	1171	b	2	1-5cm		62	7
62_8_0-1cm	144	12	43	6	6	3	0	0	0	0	0	0		Canyon	1171	b	3	0-1cm		62	8
62_8_1-5cm	217	0	9	0	7	0	0	1	0	0	0	0		Canyon	1171	b	3	1-5cm		62	8
69_1_0-1cm	134	30	24	1	2	5	0	0	0	0	0	0		Seamount	670	a	1	0-1cm		69	1
69_1_1-5cm	381	10	22	1	10	5	0	1	1	0	0	0		Seamount	670	a	1	1-5cm		69	1
69_2_0-1cm	168	7	16	0	10	0	0	0	0	0	0	0		Seamount	670	a	2	0-1cm		69	2
69_2_1-5cm	230	0	0	0	5	0	0	0	0	0	0	0		Seamount	670	a	2	1-5cm		69	2
69_5_0-1cm	155	23	43	0	0	6	0	1	0	0	0	0		Seamount	670	a	3	0-1cm		69	5
69_5_1-5cm	424	5	14	0	9	0	0	0	0	0	0	0		Seamount	670	a	3	1-5cm		69	5
72_1_0-1cm	107	13	23	0	6	2	0	1	0	0	0	0		Seamount	985	b	1	0-1cm		72	1
72_1_1-5cm	309	7	20	0	2	1	0	0	0	0	0	0		Seamount	985	b	1	1-5cm		72	1
72_4_0-1cm	300	5	7	0	5	2	0	0	0	0	0	0		Seamount	985	b	2	0-1cm		72	4
72_4_1-5cm	103	16	35	1	5	4	0	1	1	0	0	0		Seamount	985	b	2	1-5cm		72	4
72_8_0-1cm	60	3	16	3	1	2	0	0	0	0	0	0		Seamount	985	b	3	0-1cm		72	8
72_8_1-5cm	216	0	2	0	1	1	0	0	0	0	0	0		Seamount	985	b	3	1-5cm		72	8
76_4_0-1cm	401	85	129	6	9	11	0	3	0	0	0	0		Slope	1282	b	1	0-1cm		76	4
76_4_1-5cm	335	5	7	2	6	1	0	0	0	0	0	0		Slope	1282	b	1	1-5cm		76	4
76_5_0-1cm	279	49	82	4	3	10	1	4	0	0	0	1		Slope	1282	b	2	0-1cm		76	5
76_5_1-5cm	154	4	17	0	14	2	8	2	0	0	0	0		Slope	1282	b	2	1-5cm		76	5
92_2_0-1cm	304	36	27	0	9	0	1	0	0	1	0	0		Canyon	683	a	1	0-1cm		92	2
92_2_1-5cm	388	3	13	0	9	0	0	1	0	0	0	0		Canyon	683	a	1	1-5cm		92	2
92_4_0-1cm	174	4	41	0	1	1	0	0	0	1	0	0		Canyon	683	a	2	0-1cm		92	4
92_4_1-5cm	546	1	14	0	17	0	0	0	0	0	0	0		Canyon	683	a	2	1-5cm		92	4
97_1_0-1cm	413	0	4	0	6	0	0	1	0	0	0	0		Canyon	1011	b	1	0-1cm		97	1
97_1_1-5cm	342	8	32	0	12	2	0	0	0	0	0	1		Canyon	1011	b	1	1-5cm		97	1
98_1_0-1cm	325	7	8	0	3	1	0	0	0	0	0	0		Canyon	1012	b	1	0-1cm		98	1
98_1_1-5cm	334	0	3	0	3	0	0	0	0	0	0	0		Canyon	1012	b	1	1-5cm		98	1
98_2_0-1cm	161	2	11	0	6	1	0	0	0	0	0	0		Canyon	1012	b	2	0-1cm		98	2
98_2_1-5cm	277	0	1	0	1	0	0	1	0	0	0	0		Canyon	1012	b	2	1-5cm		98	2
124_4_0-1cm	295	34	32	0	2	8	0	0	0	0	0	0		Slope	690	a	1	0-1cm		124	4
124_4_1-5cm	377	10	18	0	3	2	0	0	0	0	0	0		Slope	690	a	1	1-5cm		124	4
124_7_0-1cm	384	31	31	3	4	4	0	0	0	0	0	0		Slope	690	a	2	0-1cm		124	7
124_7_1-5cm	458	3	9	0	6	2	0	0	0	0	0	0		Slope	690	a	2	1-5cm		124	7
126_1_0-1cm	271	13	14	1	1	1	0	0	1	0	0	0		Canyon	1495	d	1	0-1cm		126	1
126_1_1-5cm	575	1	4	0	3	0	0	0	0	0	0	0		Canyon	1495	d	1	1-5cm		126	1
126_3_0-1cm	285	23	35	1	1	1	0	2	0	0	0	0		Canyon	1495	d	2	0-1cm		126	3
126_3_1-5cm	458	5	6	1	11	2	0	0	0	0	0	0		Canyon	1495	d	2	1-5cm		126	3
126_6_0-1cm	353	28	29	0	7	9	1	0	0	0	0	0		Canyon	1495	d	3	0-1cm		126	6
126_6_1-5cm	418	3	8	0	6	1	0	0	0	0	0	0		Canyon	1495	d	3	1-5cm		126	6
127_3_0-1cm	254	3	15	1	0	0	0	0	1	0	0	0		Canyon	1177	c	1	0-1cm		127	3
127_3_1-5cm	435	3	0	0	1	0	0	0	0	0	0	0		Canyon	1177	c	1	1-5cm		127	3
128_3_0-1cm	231	26	38	2	5	2	0	2	0	0	0	0		Slope	1420	d	1	0-1cm		128	3
128_3_1-5cm	221	2	9	0	10	0	0	1	0	0	0	0		Slope	1420	d	1	1-5cm		128	3
129_6_0-1cm	380	11	17	0	5	2	0	2	0	0	0	0		Seamount	1456	d	1	0-1cm		129	6
129_6_1-5cm	299	4	9	0	10	0	0	0	0	0	0	0		Seamount	1456	d	1	1-5cm		129	6
130_4_0-1cm	213	1	11	3	7	5	0	0	1	0	1	0		Seamount	894	b	1	0-1cm		130	4
130_4_1-5cm	188	1	4	0	9	0	0	0	0	0	0	0		Seamount	894	b	1	1-5cm		130	4
132_1_0-1cm	230	13	24	0	4	7	0	2	0	0	0	0		Seamount	1453	d	1	0-1cm		132	1
132_1_1-5cm	180	0	1	0	6	0	1	0	0	0	0	0		Seamount	1453	d	1	1-5cm		132	1

## Sheet: Spatial covariates (HIK)
Sites	Lat	Long
4_4_0-1cm	41.6837	175.664
4_4_1-5cm	41.6837	175.664
4_5_0-1cm	41.6837	175.664
4_5_1-5cm	41.6837	175.664
4_7_0-1cm	41.6837	175.664
4_7_1-5cm	41.6837	175.664
10_6_0-1cm	41.717	175.675
10_6_1-5cm	41.717	175.675
10_8_0-1cm	41.717	175.675
10_8_1-5cm	41.717	175.675
12_3_0-1cm	41.5508	175.725
12_3_1-5cm	41.5508	175.725
12_4_0-1cm	41.5508	175.725
12_4_1-5cm	41.5508	175.725
12_8_0-1cm	41.5508	175.725
12_8_1-5cm	41.5508	175.725
17_3_0-1cm	41.6288	175.868
17_3_1-5cm	41.6288	175.868
17_8_0-1cm	41.6288	175.868
17_8_1-5cm	41.6288	175.868
19_3_0-1cm	41.627	175.864
19_3_1-5cm	41.627	175.864
22_1_0-1cm	41.51	175.719
22_1_1-5cm	41.51	175.719
22_2_0-1cm	41.51	175.719
22_2_1-5cm	41.51	175.719
22_5_0-1cm	41.51	175.719
22_5_1-5cm	41.51	175.719
27_4_0-1cm	41.4983	175.704
27_4_1-5cm	41.4983	175.704
27_6_0-1cm	41.4983	175.704
27_6_1-5cm	41.4983	175.704
27_8_0-1cm	41.4983	175.704
27_8_1-5cm	41.4983	175.704
31_1_0-1cm	41.4962	175.683
31_1_1-5cm	41.4962	175.683
31_2_0-1cm	41.4962	175.683
31_2_1-5cm	41.4962	175.683
31_3_0-1cm	41.4962	175.683
31_3_1-5cm	41.4962	175.683
38_2_0-1cm	41.5937	175.853
38_2_1-5cm	41.5937	175.853
38_3_0-1cm	41.5937	175.853
38_3_1-5cm	41.5937	175.853
38_4_0-1cm	41.5937	175.853
38_4_1-5cm	41.5937	175.853
41_1_0-1cm	41.5475	175.84
41_1_1-5cm	41.5475	175.84
41_3_0-1cm	41.5475	175.84
41_3_1-5cm	41.5475	175.84
41_8_0-1cm	41.5475	175.84
41_8_1-5cm	41.5475	175.84
44_4_0-1cm	41.5258	175.8
44_4_1-5cm	41.5258	175.8
44_5_0-1cm	41.5258	175.8
44_5_1-5cm	41.5258	175.8
44_7_0-1cm	41.5258	175.8
44_7_1-5cm	41.5258	175.8
53_3_0-1cm	41.4563	175.897
53_3_1-5cm	41.4563	175.897
58_3_0-1cm	41.408	175.898
58_3_1-5cm	41.408	175.898
58_6_0-1cm	41.408	175.898
58_6_1-5cm	41.408	175.898
58_7_0-1cm	41.408	175.898
58_7_1-5cm	41.408	175.898
62_6_0-1cm	41.476	175.948
62_6_1-5cm	41.476	175.948
62_7_0-1cm	41.476	175.948
62_7_1-5cm	41.476	175.948
62_8_0-1cm	41.476	175.948
62_8_1-5cm	41.476	175.948
69_1_0-1cm	41.3353	176.188
69_1_1-5cm	41.3353	176.188
69_2_0-1cm	41.3353	176.188
69_2_1-5cm	41.3353	176.188
69_5_0-1cm	41.3353	176.188
69_5_1-5cm	41.3353	176.188
72_1_0-1cm	41.3657	176.196
72_1_1-5cm	41.3657	176.196
72_4_0-1cm	41.3657	176.196
72_4_1-5cm	41.3657	176.196
72_8_0-1cm	41.3657	176.196
72_8_1-5cm	41.3657	176.196
76_4_0-1cm	41.6833	175.65
76_4_1-5cm	41.6833	175.65
76_5_0-1cm	41.6833	175.65
76_5_1-5cm	41.6833	175.65
92_2_0-1cm	41.8922	174.635
92_2_1-5cm	41.8922	174.635
92_4_0-1cm	41.8922	174.635
92_4_1-5cm	41.8922	174.635
97_1_0-1cm	41.9458	174.617
97_1_1-5cm	41.9458	174.617
98_1_0-1cm	41.9277	174.617
98_1_1-5cm	41.9277	174.617
98_2_0-1cm	41.9277	174.617
98_2_1-5cm	41.9277	174.617
124_4_0-1cm	41.986	174.697
124_4_1-5cm	41.986	174.697
124_7_0-1cm	41.986	174.697
124_7_1-5cm	41.986	174.697
126_1_0-1cm	42.1422	174.549
126_1_1-5cm	42.1422	174.549
126_3_0-1cm	42.1422	174.549
126_3_1-5cm	42.1422	174.549
126_6_0-1cm	42.1422	174.549
126_6_1-5cm	42.1422	174.549
127_3_0-1cm	42.1228	174.54
127_3_1-5cm	42.1228	174.54
128_3_0-1cm	42.0485	174.7
128_3_1-5cm	42.0485	174.7
129_6_0-1cm	42.1345	174.586
129_6_1-5cm	42.1345	174.586
130_4_0-1cm	42.1363	174.574
130_4_1-5cm	42.1363	174.574
132_1_0-1cm	42.1345	174.585
132_1_1-5cm	42.1345	174.585

## Sheet: Second stage analysis (HIK)
	Nematoda	Nauplii	Copepoda	Ostracoda	Annelida	Kinorhyncha	Isopoda	Tanaidacea	Amphipoda	Cumacea	Aplacophora	Bivalvia	Priapulid		Habitat	Water depth	Strata	Core	Sed. depth	HabitatStrata
31_1_0-1cm	202	29	29	7	2	3	0	0	1	0	0	0	0		Canyon	730	a	1	0-1cm	Canyona
31_1_1-5cm	615	3	9	0	25	4	0	0	0	0	0	0	0		Canyon	730	a	1	1-5cm	Canyona
31_2_0-1cm	153	25	18	4	4	8	0	0	0	0	0	0	0		Canyon	730	a	2	0-1cm	Canyona
31_2_1-5cm	1045	39	60	3	30	7	0	0	0	0	0	0	0		Canyon	730	a	2	1-5cm	Canyona
31_3_0-1cm	108	6	5	2	2	2	0	0	0	0	0	0	0		Canyon	730	a	3	0-1cm	Canyona
31_3_1-5cm	1213	18	33	3	34	7	0	1	0	0	0	0	0		Canyon	730	a	3	1-5cm	Canyona
44_4_0-1cm	257	13	32	0	3	1	0	2	0	0	0	0	0		Slope	728	a	1	0-1cm	Slopea
44_4_1-5cm	480	3	7	0	5	0	0	0	0	0	0	0	0		Slope	728	a	1	1-5cm	Slopea
44_5_0-1cm	113	8	20	1	1	0	0	0	0	0	0	0	0		Slope	728	a	2	0-1cm	Slopea
44_5_1-5cm	351	12	59	1	3	4	0	0	2	0	0	0	0		Slope	728	a	2	1-5cm	Slopea
44_7_0-1cm	202	24	62	0	7	7	0	0	3	0	0	0	0		Slope	728	a	3	0-1cm	Slopea
44_7_1-5cm	462	12	38	0	9	3	1	0	0	0	0	0	0		Slope	728	a	3	1-5cm	Slopea
58_3_0-1cm	173	11	30	1	1	5	0	0	1	0	0	0	0		Canyon	670	a	1	0-1cm	Canyona
58_3_1-5cm	990	67	74	0	18	18	1	2	1	0	0	0	0		Canyon	670	a	1	1-5cm	Canyona
58_6_0-1cm	221	15	30	2	5	2	0	0	0	0	0	0	0		Canyon	670	a	2	0-1cm	Canyona
58_6_1-5cm	1074	12	21	1	10	3	1	1	0	0	0	0	0		Canyon	670	a	2	1-5cm	Canyona
58_7_0-1cm	107	6	11	0	1	3	0	0	0	0	0	0	0		Canyon	670	a	3	0-1cm	Canyona
58_7_1-5cm	962	35	84	0	16	12	0	2	3	1	0	0	0		Canyon	670	a	3	1-5cm	Canyona
69_1_0-1cm	134	30	24	1	2	5	0	0	0	0	0	0	0		Seamount	670	a	1	0-1cm	Seamounta
69_1_1-5cm	381	10	22	1	10	5	0	1	1	0	0	0	0		Seamount	670	a	1	1-5cm	Seamounta
69_2_0-1cm	168	7	16	0	10	0	0	0	0	0	0	0	0		Seamount	670	a	2	0-1cm	Seamounta
69_2_1-5cm	230	0	0	0	5	0	0	0	0	0	0	0	0		Seamount	670	a	2	1-5cm	Seamounta
69_5_0-1cm	155	23	43	0	0	6	0	1	0	0	0	0	0		Seamount	670	a	3	0-1cm	Seamounta
69_5_1-5cm	424	5	14	0	9	0	0	0	0	0	0	0	0		Seamount	670	a	3	1-5cm	Seamounta
92_2_0-1cm	304	36	27	0	9	0	1	0	0	1	0	0	0		Canyon	683	a	1	0-1cm	Canyona
92_2_1-5cm	388	3	13	0	9	0	0	1	0	0	0	0	0		Canyon	683	a	1	1-5cm	Canyona
92_4_0-1cm	174	4	41	0	1	1	0	0	0	1	0	0	0		Canyon	683	a	2	0-1cm	Canyona
92_4_1-5cm	546	1	14	0	17	0	0	0	0	0	0	0	0		Canyon	683	a	2	1-5cm	Canyona
124_4_0-1cm	295	34	32	0	2	8	0	0	0	0	0	0	0		Slope	690	a	1	0-1cm	Slopea
124_4_1-5cm	377	10	18	0	3	2	0	0	0	0	0	0	0		Slope	690	a	1	1-5cm	Slopea
124_7_0-1cm	384	31	31	3	4	4	0	0	0	0	0	0	0		Slope	690	a	2	0-1cm	Slopea
124_7_1-5cm	458	3	9	0	6	2	0	0	0	0	0	0	0		Slope	690	a	2	1-5cm	Slopea
4_4_0-1cm	252	33	70	2	9	10	0	0	1	0	0	0	0		Slope	1046	b	1	0-1cm	Slopeb
4_4_1-5cm	500	1	16	0	9	3	0	0	0	0	0	0	0		Slope	1046	b	1	1-5cm	Slopeb
4_5_0-1cm	240	58	62	7	4	6	1	1	0	0	0	0	0		Slope	1046	b	2	0-1cm	Slopeb
4_5_1-5cm	551	3	15	0	7	4	1	0	0	0	0	0	0		Slope	1046	b	2	1-5cm	Slopeb
4_7_0-1cm	359	68	61	2	4	3	1	0	0	0	0	0	0		Slope	1046	b	3	0-1cm	Slopeb
4_7_1-5cm	474	9	28	3	12	4	0	0	0	0	0	0	0		Slope	1046	b	3	1-5cm	Slopeb
27_4_0-1cm	169	48	65	3	2	15	0	0	0	0	0	1	0		Canyon	1013	b	1	0-1cm	Canyonb
27_4_1-5cm	689	50	82	12	32	7	0	2	1	0	0	2	0		Canyon	1013	b	1	1-5cm	Canyonb
27_6_0-1cm	377	68	76	9	4	14	0	1	0	0	0	3	0		Canyon	1013	b	2	0-1cm	Canyonb
27_6_1-5cm	443	9	10	0	11	2	0	2	0	0	0	3	0		Canyon	1013	b	2	1-5cm	Canyonb
27_8_0-1cm	453	84	139	7	9	25	0	1	1	0	0	5	0		Canyon	1013	b	3	0-1cm	Canyonb
27_8_1-5cm	664	2	8	1	16	5	0	0	0	0	0	0	0		Canyon	1013	b	3	1-5cm	Canyonb
41_1_0-1cm	156	4	11	0	1	2	0	0	0	0	0	0	0		Slope	942	b	1	0-1cm	Slopeb
41_1_1-5cm	187	1	0	0	0	0	0	0	0	0	0	0	0		Slope	942	b	1	1-5cm	Slopeb
41_3_0-1cm	65	5	5	1	0	1	0	0	0	0	0	0	0		Slope	942	b	2	0-1cm	Slopeb
41_3_1-5cm	430	25	27	0	8	5	0	0	0	0	0	0	0		Slope	942	b	2	1-5cm	Slopeb
41_8_0-1cm	293	24	31	4	3	2	0	1	0	0	0	0	0		Slope	942	b	3	0-1cm	Slopeb
41_8_1-5cm	278	2	6	1	2	1	0	1	0	0	0	0	0		Slope	942	b	3	1-5cm	Slopeb
53_3_0-1cm	187	8	20	0	3	1	0	0	0	0	2	0	0		Canyon	948	b	1	0-1cm	Canyonb
53_3_1-5cm	126	1	3	0	2	0	0	0	0	0	0	0	0		Canyon	948	b	1	1-5cm	Canyonb
62_6_0-1cm	172	13	23	0	9	4	0	0	0	0	0	0	0		Canyon	1171	b	1	0-1cm	Canyonb
62_6_1-5cm	338	13	38	0	17	3	0	0	0	0	0	0	0		Canyon	1171	b	1	1-5cm	Canyonb
62_7_0-1cm	207	49	71	4	9	7	1	0	0	0	0	0	0		Canyon	1171	b	2	0-1cm	Canyonb
62_7_1-5cm	473	11	15	0	12	8	0	1	0	0	0	0	0		Canyon	1171	b	2	1-5cm	Canyonb
62_8_0-1cm	144	12	43	6	6	3	0	0	0	0	0	0	0		Canyon	1171	b	3	0-1cm	Canyonb
62_8_1-5cm	217	0	9	0	7	0	0	1	0	0	0	0	0		Canyon	1171	b	3	1-5cm	Canyonb
72_1_0-1cm	107	13	23	0	6	2	0	1	0	0	0	0	0		Seamount	985	b	1	0-1cm	Seamountb
72_1_1-5cm	309	7	20	0	2	1	0	0	0	0	0	0	0		Seamount	985	b	1	1-5cm	Seamountb
72_4_0-1cm	300	5	7	0	5	2	0	0	0	0	0	0	0		Seamount	985	b	2	0-1cm	Seamountb
72_4_1-5cm	103	16	35	1	5	4	0	1	1	0	0	0	0		Seamount	985	b	2	1-5cm	Seamountb
72_8_0-1cm	60	3	16	3	1	2	0	0	0	0	0	0	0		Seamount	985	b	3	0-1cm	Seamountb
72_8_1-5cm	216	0	2	0	1	1	0	0	0	0	0	0	0		Seamount	985	b	3	1-5cm	Seamountb
76_4_0-1cm	401	85	129	6	9	11	0	3	0	0	0	0	0		Slope	1282	b	1	0-1cm	Slopeb
76_4_1-5cm	335	5	7	2	6	1	0	0	0	0	0	0	0		Slope	1282	b	1	1-5cm	Slopeb
76_5_0-1cm	279	49	82	4	3	10	1	4	0	0	0	1	0		Slope	1282	b	2	0-1cm	Slopeb
76_5_1-5cm	154	4	17	0	14	2	8	2	0	0	0	0	0		Slope	1282	b	2	1-5cm	Slopeb
97_1_0-1cm	413	0	4	0	6	0	0	1	0	0	0	0	0		Canyon	1011	b	1	0-1cm	Canyonb
97_1_1-5cm	342	8	32	0	12	2	0	0	0	0	0	1	0		Canyon	1011	b	1	1-5cm	Canyonb
98_1_0-1cm	325	7	8	0	3	1	0	0	0	0	0	0	0		Canyon	1012	b	1	0-1cm	Canyonb
98_1_1-5cm	334	0	3	0	3	0	0	0	0	0	0	0	0		Canyon	1012	b	1	1-5cm	Canyonb
98_2_0-1cm	161	2	11	0	6	1	0	0	0	0	0	0	0		Canyon	1012	b	2	0-1cm	Canyonb
98_2_1-5cm	277	0	1	0	1	0	0	1	0	0	0	0	0		Canyon	1012	b	2	1-5cm	Canyonb
130_4_0-1cm	213	1	11	3	7	5	0	0	1	0	1	0	0		Seamount	894	b	1	0-1cm	Seamountb
130_4_1-5cm	188	1	4	0	9	0	0	0	0	0	0	0	0		Seamount	894	b	1	1-5cm	Seamountb
84_8_R1_0-1cm	105	8	30	0	8	0	0	1	1	0	0	0	1		Seep	1000	b	1	0-1cm	Seepb
84_8_R1_1-5cm	620	5	34	0	12	4	0	2	0	0	0	0	0		Seep	1001	b	2	1-5cm	Seepb
84_8_R2_0-1cm	138	5	56	1	1	3	0	0	1	0	1	0	0		Seep	1002	b	1	0-1cm	Seepb
84_8_R2_1-5cm	124	0	10	2	9	0	0	0	0	0	0	0	0		Seep	1003	b	2	1-5cm	Seepb
86_9_R1_0-1cm	128	2	23	2	6	3	0	2	2	0	0	0	0		Seep	1004	b	1	0-1cm	Seepb
86_9_R1_1-5cm	264	4	1	0	10	0	0	0	1	0	0	0	0		Seep	1005	b	2	1-5cm	Seepb
86_9_R2_0-1cm	356	4	33	3	10	4	0	0	3	0	0	2	0		Seep	1006	b	1	0-1cm	Seepb
86_9_R2_1-5cm	150	0	1	0	9	0	0	0	2	0	0	2	0		Seep	1007	b	2	1-5cm	Seepb
112_10_R1_0-1cm	102	29	62	2	2	2	0	3	6	0	0	0	0		Seep	1008	b	1	0-1cm	Seepb
112_10_R1_1-5cm	282	2	16	0	10	0	0	3	0	0	0	1	0		Seep	1009	b	2	1-5cm	Seepb
112_10_R2_0-1cm	312	121	148	3	5	10	0	2	1	0	0	1	0		Seep	1010	b	1	0-1cm	Seepb
112_10_R2_1-5cm	307	24	7	1	13	1	0	0	0	0	0	2	0		Seep	1011	b	2	1-5cm	Seepb
116_15_R1_0-1cm	494	97	37	2	8	7	0	1	17	0	0	1	5		Seep	1012	b	1	0-1cm	Seepb
116_15_R1_1-5cm	320	6	7	1	23	2	0	1	0	0	0	1	0		Seep	1013	b	2	1-5cm	Seepb
116_15_R2_0-1cm	211	25	30	1	5	3	0	1	8	0	0	0	0		Seep	1014	b	1	0-1cm	Seepb
116_15_R2_1-5cm	214	12	8	1	5	3	0	1	1	0	0	2	0		Seep	1015	b	2	1-5cm	Seepb
118_16_R1_0-1cm	330	57	87	5	6	13	0	11	5	0	0	2	0		Seep	1016	b	1	0-1cm	Seepb
118_16_R1_1-5cm	249	8	4	0	12	0	0	6	1	0	0	0	0		Seep	1017	b	2	1-5cm	Seepb
118_16_R2_0-1cm	193	110	91	6	5	3	0	6	15	0	0	3	0		Seep	1018	b	1	0-1cm	Seepb
118_16_R2_1-5cm	356	30	17	0	17	1	0	1	0	0	0	1	0		Seep	1019	b	2	1-5cm	Seepb
123_17_R1_0-1cm	452	49	92	6	10	3	0	11	6	0	0	5	0		Seep	1020	b	1	0-1cm	Seepb
123_17_R1_1-5cm	258	2	5	0	21	0	0	1	2	0	0	1	0		Seep	1021	b	2	1-5cm	Seepb
123_17_R2_0-1cm	223	120	76	0	6	0	0	6	15	0	0	0	0		Seep	1022	b	1	0-1cm	Seepb
123_17_R2_1-5cm	249	6	9	0	9	0	0	0	0	0	0	0	0		Seep	1023	b	2	1-5cm	Seepb
22_1_0-1cm	269	70	47	6	3	4	0	0	0	0	0	0	0		Canyon	1188	c	1	0-1cm	Canyonc
22_1_1-5cm	434	16	12	2	16	0	0	1	0	0	0	1	0		Canyon	1188	c	1	1-5cm	Canyonc
22_2_0-1cm	270	24	31	2	8	5	0	0	0	0	0	0	0		Canyon	1188	c	2	0-1cm	Canyonc
22_2_1-5cm	344	0	5	1	4	0	0	0	0	0	0	0	0		Canyon	1188	c	2	1-5cm	Canyonc
22_5_0-1cm	240	48	41	0	9	7	0	2	0	0	0	0	0		Canyon	1188	c	3	0-1cm	Canyonc
22_5_1-5cm	502	10	20	2	6	2	0	2	0	0	0	0	0		Canyon	1188	c	3	1-5cm	Canyonc
38_2_0-1cm	396	74	91	10	10	9	4	1	1	1	0	0	0		Slope	1121	c	1	0-1cm	Slopec
38_2_1-5cm	471	4	25	1	8	0	0	0	0	0	0	0	0		Slope	1121	c	1	1-5cm	Slopec
38_3_0-1cm	197	55	50	3	8	5	0	0	0	0	0	0	0		Slope	1121	c	2	0-1cm	Slopec
38_3_1-5cm	425	32	40	2	6	4	0	1	0	0	0	0	0		Slope	1121	c	2	1-5cm	Slopec
38_4_0-1cm	232	14	14	0	1	0	0	0	0	0	0	0	0		Slope	1121	c	3	0-1cm	Slopec
38_4_1-5cm	42	18	22	0	1	1	0	0	0	0	0	0	0		Slope	1121	c	3	1-5cm	Slopec
127_3_0-1cm	254	3	15	1	0	0	0	0	1	0	0	0	0		Canyon	1177	c	1	0-1cm	Canyonc
127_3_1-5cm	435	3	0	0	1	0	0	0	0	0	0	0	0		Canyon	1177	c	1	1-5cm	Canyonc

## Sheet: Spatial covar. 2nd stage (HIK)
	Lat	Long
31_1_0-1cm	41.4962	175.683
31_1_1-5cm	41.4962	175.683
31_2_0-1cm	41.4962	175.683
31_2_1-5cm	41.4962	175.683
31_3_0-1cm	41.4962	175.683
31_3_1-5cm	41.4962	175.683
44_4_0-1cm	41.5258	175.8
44_4_1-5cm	41.5258	175.8
44_5_0-1cm	41.5258	175.8
44_5_1-5cm	41.5258	175.8
44_7_0-1cm	41.5258	175.8
44_7_1-5cm	41.5258	175.8
58_3_0-1cm	41.408	175.898
58_3_1-5cm	41.408	175.898
58_6_0-1cm	41.408	175.898
58_6_1-5cm	41.408	175.898
58_7_0-1cm	41.408	175.898
58_7_1-5cm	41.408	175.898
69_1_0-1cm	41.3353	176.188
69_1_1-5cm	41.3353	176.188
69_2_0-1cm	41.3353	176.188
69_2_1-5cm	41.3353	176.188
69_5_0-1cm	41.3353	176.188
69_5_1-5cm	41.3353	176.188
92_2_0-1cm	41.8922	174.635
92_2_1-5cm	41.8922	174.635
92_4_0-1cm	41.8922	174.635
92_4_1-5cm	41.8922	174.635
124_4_0-1cm	41.986	174.697
124_4_1-5cm	41.986	174.697
124_7_0-1cm	41.986	174.697
124_7_1-5cm	41.986	174.697
4_4_0-1cm	41.6837	175.664
4_4_1-5cm	41.6837	175.664
4_5_0-1cm	41.6837	175.664
4_5_1-5cm	41.6837	175.664
4_7_0-1cm	41.6837	175.664
4_7_1-5cm	41.6837	175.664
27_4_0-1cm	41.4983	175.704
27_4_1-5cm	41.4983	175.704
27_6_0-1cm	41.4983	175.704
27_6_1-5cm	41.4983	175.704
27_8_0-1cm	41.4983	175.704
27_8_1-5cm	41.4983	175.704
41_1_0-1cm	41.5475	175.84
41_1_1-5cm	41.5475	175.84
41_3_0-1cm	41.5475	175.84
41_3_1-5cm	41.5475	175.84
41_8_0-1cm	41.5475	175.84
41_8_1-5cm	41.5475	175.84
53_3_0-1cm	41.4563	175.897
53_3_1-5cm	41.4563	175.897
62_6_0-1cm	41.476	175.948
62_6_1-5cm	41.476	175.948
62_7_0-1cm	41.476	175.948
62_7_1-5cm	41.476	175.948
62_8_0-1cm	41.476	175.948
62_8_1-5cm	41.476	175.948
72_1_0-1cm	41.3657	176.196
72_1_1-5cm	41.3657	176.196
72_4_0-1cm	41.3657	176.196
72_4_1-5cm	41.3657	176.196
72_8_0-1cm	41.3657	176.196
72_8_1-5cm	41.3657	176.196
76_4_0-1cm	41.6833	175.65
76_4_1-5cm	41.6833	175.65
76_5_0-1cm	41.6833	175.65
76_5_1-5cm	41.6833	175.65
97_1_0-1cm	41.9458	174.617
97_1_1-5cm	41.9458	174.617
98_1_0-1cm	41.9277	174.617
98_1_1-5cm	41.9277	174.617
98_2_0-1cm	41.9277	174.617
98_2_1-5cm	41.9277	174.617
130_4_0-1cm	42.1363	174.574
130_4_1-5cm	42.1363	174.574
84_8_R1_0-1cm	41.7832	175.401
84_8_R1_1-5cm	41.7832	175.401
84_8_R2_0-1cm	41.7832	175.401
84_8_R2_1-5cm	41.7832	175.401
86_9_R1_0-1cm	41.782	175.402
86_9_R1_1-5cm	41.782	175.402
86_9_R2_0-1cm	41.782	175.402
86_9_R2_1-5cm	41.782	175.402
112_10_R1_0-1cm	41.0782	175.401
112_10_R1_1-5cm	41.0782	175.401
112_10_R2_0-1cm	41.0782	175.401
112_10_R2_1-5cm	41.0782	175.401
116_15_R1_0-1cm	41.7885	175.407
116_15_R1_1-5cm	41.7885	175.407
116_15_R2_0-1cm	41.7885	175.407
116_15_R2_1-5cm	41.7885	175.407
118_16_R1_0-1cm	41.7893	175.407
118_16_R1_1-5cm	41.7893	175.407
118_16_R2_0-1cm	41.7893	175.407
118_16_R2_1-5cm	41.7893	175.407
123_17_R1_0-1cm	41.079	175.407
123_17_R1_1-5cm	41.079	175.407
123_17_R2_0-1cm	41.079	175.407
123_17_R2_1-5cm	41.079	175.407
22_1_0-1cm	41.51	175.719
22_1_1-5cm	41.51	175.719
22_2_0-1cm	41.51	175.719
22_2_1-5cm	41.51	175.719
22_5_0-1cm	41.51	175.719
22_5_1-5cm	41.51	175.719
38_2_0-1cm	41.5937	175.853
38_2_1-5cm	41.5937	175.853
38_3_0-1cm	41.5937	175.853
38_3_1-5cm	41.5937	175.853
38_4_0-1cm	41.5937	175.853
38_4_1-5cm	41.5937	175.853
127_3_0-1cm	42.1228	174.54
127_3_1-5cm	42.1228	174.54

## Sheet: Bay of Plenty (BoP)-PERMANOVA
	Nematoda	Nauplii	Copepoda	Ostracoda	Annelida	Kinorhyncha	Isopoda	Tanaidacea	Amphipoda	Cumacea	Aplacophora	Bivalvia	Gastrotricha	Tardigrada	Loricifera		Habitat	Water_depth	Strata	Core	Sed. depth	HabitatStrata	HabitatSed. depth
2_3_0–1cm	117	19	15	0	2	0	0	0	0	0	0	0	0	3	0		Slope	699	a	1	0-1cm	Slopea	Slope0-1cm
2_3_1–5cm	181	6	8	1	1	0	0	0	0	0	0	0	0	0	0		Slope	699	a	1	1-5cm	Slopea	Slope1-5cm
2_4_0–1cm	123	17	19	0	8	3	0	0	0	0	0	0	0	2	0		Slope	699	a	2	0-1cm	Slopea	Slope0-1cm
2_4_1–5cm	144	1	3	0	1	0	0	0	0	0	0	0	0	3	0		Slope	699	a	2	1-5cm	Slopea	Slope1-5cm
2_6_0–1cm	106	6	12	0	1	1	0	0	0	0	0	0	0	0	0		Slope	699	a	3	0-1cm	Slopea	Slope0-1cm
2_6_1–5cm	215	0	2	0	5	0	0	0	0	0	0	0	0	0	0		Slope	699	a	3	1-5cm	Slopea	Slope1-5cm
5_45_0–1cm	145	2	7	0	2	0	0	0	0	0	0	0	0	3	0		Slope	998	b	1	0-1cm	Slopeb	Slope0-1cm
5_45_1–5cm	152	0	2	0	1	0	0	0	0	0	0	0	0	1	0		Slope	998	b	1	1-5cm	Slopeb	Slope1-5cm
5_47_0–1cm	173	25	18	2	5	0	0	0	0	0	0	0	0	1	0		Slope	998	b	2	0-1cm	Slopeb	Slope0-1cm
5_47_1–5cm	252	6	9	0	3	0	0	0	0	0	0	0	0	1	0		Slope	998	b	2	1-5cm	Slopeb	Slope1-5cm
5_48_0–1cm	150	16	11	0	3	0	0	0	0	0	0	0	0	1	0		Slope	998	b	3	0-1cm	Slopeb	Slope0-1cm
5_48_1–5cm	149	3	1	2	0	0	0	0	0	0	0	0	0	0	0		Slope	998	b	3	1-5cm	Slopeb	Slope1-5cm
9_82_0–1cm	100	6	6	0	0	1	0	0	0	0	0	0	0	0	0		Slope	1193	c	1	0-1cm	Slopec	Slope0-1cm
9_82_1–5cm	270	1	7	0	1	0	0	0	0	0	0	0	0	0	0		Slope	1193	c	1	1-5cm	Slopec	Slope1-5cm
9_85_0–1cm	76	7	14	1	2	0	0	0	0	0	0	0	0	0	1		Slope	1193	c	2	0-1cm	Slopec	Slope0-1cm
9_85_1–5cm	204	3	10	0	0	0	0	0	0	0	0	0	0	0	0		Slope	1193	c	2	1-5cm	Slopec	Slope1-5cm
9_86_0–1cm	140	5	6	0	3	2	0	0	0	0	0	0	0	0	0		Slope	1193	c	3	0-1cm	Slopec	Slope0-1cm
9_86_1–5cm	239	0	10	0	4	0	0	0	0	0	0	0	0	0	0		Slope	1193	c	3	1-5cm	Slopec	Slope1-5cm
13_102_0–1cm	113	10	12	0	2	3	0	0	0	0	0	0	0	0	0		Slope	1501	d	1	0-1cm	Sloped	Slope0-1cm
13_102_1–5cm	238	2	1	0	0	0	0	0	0	0	0	0	0	0	0		Slope	1501	d	1	1-5cm	Sloped	Slope1-5cm
13_105_0–1cm	120	16	13	0	2	4	0	0	0	0	0	0	0	5	0		Slope	1501	d	2	0-1cm	Sloped	Slope0-1cm
13_105_1–5cm	105	0	0	0	2	0	0	0	0	0	0	0	0	0	0		Slope	1501	d	2	1-5cm	Sloped	Slope1-5cm
13_106_0–1cm	83	7	14	0	0	0	0	0	0	0	0	0	0	0	2		Slope	1501	d	3	0-1cm	Sloped	Slope0-1cm
13_106_1–5cm	150	2	3	0	1	2	0	0	0	0	0	0	0	0	0		Slope	1501	d	3	1-5cm	Sloped	Slope1-5cm
42_454_0–1cm	70	3	5	0	0	0	0	0	0	0	0	0	0	0	0		Slope	1501	d	1	0-1cm	Sloped	Slope0-1cm
42_454_1–5cm	387	14	20	0	3	1	0	1	0	0	0	0	0	3	0		Slope	1501	d	1	1-5cm	Sloped	Slope1-5cm
42_451_0–1cm	173	11	10	0	2	0	0	0	1	0	0	0	0	1	0		Slope	1501	d	2	0-1cm	Sloped	Slope0-1cm
42_451_1–5cm	125	1	5	0	1	0	0	0	0	0	0	0	0	0	0		Slope	1501	d	2	1-5cm	Sloped	Slope1-5cm
44_504_0–1cm	160	6	11	0	1	0	0	0	0	0	0	0	0	0	0		Slope	1202	c	1	0-1cm	Slopec	Slope0-1cm
44_504_1–5cm	105	1	1	0	0	0	0	1	0	0	0	0	0	0	0		Slope	1202	c	1	1-5cm	Slopec	Slope1-5cm
44_502_0–1cm	164	4	11	1	0	4	0	0	1	0	0	0	0	1	0		Slope	1202	c	2	0-1cm	Slopec	Slope0-1cm
44_502_1–5cm	168	0	2	0	3	0	0	0	0	0	0	0	0	0	0		Slope	1202	c	2	1-5cm	Slopec	Slope1-5cm
44_508_0–1cm	96	4	6	1	0	1	0	0	0	0	0	0	0	0	0		Slope	1202	c	3	0-1cm	Slopec	Slope0-1cm
44_508_1–5cm	179	3	3	0	1	0	0	0	0	0	0	0	0	0	0		Slope	1202	c	3	1-5cm	Slopec	Slope1-5cm
49_535_0–1cm	301	20	20	2	4	3	0	0	0	0	0	0	0	0	0		Slope	1004	b	1	0-1cm	Slopeb	Slope0-1cm
49_535_1–5cm	108	0	1	0	1	0	0	0	0	0	0	0	0	0	0		Slope	1004	b	1	1-5cm	Slopeb	Slope1-5cm
49_537_0–1cm	117	8	13	0	4	2	0	0	0	0	0	0	0	1	2		Slope	1004	b	2	0-1cm	Slopeb	Slope0-1cm
49_537_1–5cm	170	0	3	0	1	0	0	0	0	0	0	0	0	0	0		Slope	1004	b	2	1-5cm	Slopeb	Slope1-5cm
49_538_0–1cm	243	13	16	1	2	2	0	0	0	0	0	0	0	1	0		Slope	1004	b	3	0-1cm	Slopeb	Slope0-1cm
49_538_1–5cm	174	0	5	0	3	0	0	0	0	0	0	0	0	0	0		Slope	1004	b	3	1-5cm	Slopeb	Slope1-5cm
52_566_0–1cm	341	19	21	10	6	1	1	1	0	0	1	0	0	1	1		Slope	710	a	1	0-1cm	Slopea	Slope0-1cm
52_566_1–5cm	259	2	1	0	2	0	0	0	0	0	0	0	1	0	0		Slope	710	a	1	1-5cm	Slopea	Slope1-5cm
52_567_0–1cm	291	24	28	2	4	1	0	2	0	0	0	0	0	1	0		Slope	710	a	2	0-1cm	Slopea	Slope0-1cm
52_567_1–5cm	313	0	5	0	3	1	0	0	0	0	0	0	0	0	0		Slope	710	a	2	1-5cm	Slopea	Slope1-5cm
52_565_0–1cm	214	7	9	0	2	0	0	0	0	0	0	0	0	1	0		Slope	710	a	3	0-1cm	Slopea	Slope0-1cm
52_565_1–5cm	268	0	1	0	1	0	0	0	0	0	0	0	0	0	0		Slope	710	a	3	1-5cm	Slopea	Slope1-5cm
55_618_0–1cm	341	19	20	2	3	0	1	0	0	0	0	0	1	1	0		Canyon	705	a	1	0-1cm	Canyona	Canyon0-1cm
55_618_1–5cm	549	7	3	0	4	0	0	1	0	0	0	0	0	0	0		Canyon	705	a	1	1-5cm	Canyona	Canyon1-5cm
55_614_0–1cm	201	4	7	0	2	0	0	0	0	0	0	0	0	0	0		Canyon	705	a	2	0-1cm	Canyona	Canyon0-1cm
55_614_1–5cm	198	1	6	0	1	0	0	0	0	0	0	0	0	0	0		Canyon	705	a	2	1-5cm	Canyona	Canyon1-5cm
55_616_0–1cm	258	24	37	3	2	1	0	1	1	0	0	0	0	0	0		Canyon	705	a	3	0-1cm	Canyona	Canyon0-1cm
55_616_1–5cm	395	7	11	0	4	0	0	0	0	0	0	0	0	0	0		Canyon	705	a	3	1-5cm	Canyona	Canyon1-5cm
60_661_0–1cm	101	10	13	0	4	0	2	0	0	0	0	0	0	0	0		Canyon	900	b	1	0-1cm	Canyonb	Canyon0-1cm
60_661_1–5cm	156	4	5	0	1	0	0	0	0	0	0	0	0	0	0		Canyon	900	b	1	1-5cm	Canyonb	Canyon1-5cm
60_662_0–1cm	118	6	8	0	4	0	1	0	0	0	0	0	0	0	0		Canyon	900	b	2	0-1cm	Canyonb	Canyon0-1cm
60_662_1–5cm	373	5	8	0	2	1	0	0	0	0	0	0	0	0	0		Canyon	900	b	2	1-5cm	Canyonb	Canyon1-5cm
61_666_0–1cm	255	13	21	2	3	1	0	1	0	0	0	0	0	0	1		Canyon	870	b	1	0-1cm	Canyonb	Canyon0-1cm
61_666_1–5cm	397	5	4	0	2	0	0	0	0	0	0	0	0	0	0		Canyon	870	b	1	1-5cm	Canyonb	Canyon1-5cm
65_711_0–1cm	246	18	31	0	1	1	0	0	0	0	0	0	0	0	0		Canyon	1254	c	1	0-1cm	Canyonc	Canyon0-1cm
65_711_1–5cm	278	1	9	0	1	0	0	0	0	0	0	0	0	0	0		Canyon	1254	c	1	1-5cm	Canyonc	Canyon1-5cm
66_717_0–1cm	156	5	14	1	4	1	0	1	0	0	0	0	0	0	0		Canyon	1254	c	2	0-1cm	Canyonc	Canyon0-1cm
66_717_1–5cm	487	3	5	0	0	0	0	1	0	0	0	0	0	0	0		Canyon	1254	c	2	1-5cm	Canyonc	Canyon1-5cm
66_719_0–1cm	170	5	4	0	2	0	0	0	0	0	0	0	0	0	0		Canyon	1254	c	3	0-1cm	Canyonc	Canyon0-1cm
66_719_1–5cm	199	0	1	0	1	0	0	0	0	0	0	0	0	0	0		Canyon	1254	c	3	1-5cm	Canyonc	Canyon1-5cm
70_781_0–1cm	255	10	11	0	1	0	0	0	1	0	0	0	0	0	0		Canyon	1518	d	1	0-1cm	Canyond	Canyon0-1cm
70_781_1–5cm	284	2	6	0	1	0	0	0	0	0	0	0	0	0	0		Canyon	1518	d	1	1-5cm	Canyond	Canyon1-5cm
70_785_0–1cm	291	1	20	1	1	3	0	0	0	0	0	0	0	0	0		Canyon	1518	d	2	0-1cm	Canyond	Canyon0-1cm
70_785_1–5cm	284	0	6	0	2	2	0	0	0	0	0	0	0	0	0		Canyon	1518	d	2	1-5cm	Canyond	Canyon1-5cm
70_787_0–1cm	330	16	13	1	1	1	0	0	0	0	0	0	0	1	0		Canyon	1518	d	3	0-1cm	Canyond	Canyon0-1cm
70_787_1–5cm	394	0	4	0	1	0	0	0	0	0	0	0	0	1	0		Canyon	1518	d	3	1-5cm	Canyond	Canyon1-5cm
105_1281_0–1cm	214	8	4	0	4	0	0	0	0	0	0	0	0	0	0		Canyon	1486	d	1	0-1cm	Canyond	Canyon0-1cm
105_1281_1–5cm	234	2	0	0	4	0	0	0	0	0	0	0	0	0	0		Canyon	1486	d	1	1-5cm	Canyond	Canyon1-5cm
105_1286_0–1cm	239	11	9	0	2	0	1	0	0	0	0	0	0	1	0		Canyon	1486	d	2	0-1cm	Canyond	Canyon0-1cm
105_1286_1–5cm	272	3	4	0	2	0	0	1	0	0	0	0	0	0	0		Canyon	1486	d	2	1-5cm	Canyond	Canyon1-5cm
105_1287_0–1cm	145	12	15	0	2	2	0	0	0	0	0	0	0	1	0		Canyon	1486	d	3	0-1cm	Canyond	Canyon0-1cm
105_1287_1–5cm	246	1	4	1	2	0	0	1	0	0	0	0	0	0	0		Canyon	1486	d	3	1-5cm	Canyond	Canyon1-5cm
111_1333_0–1cm	106	4	5	0	0	0	0	0	0	0	0	0	0	0	0		Canyon	1221	c	1	0-1cm	Canyonc	Canyon0-1cm
111_1333_1–5cm	199	2	9	0	2	0	0	0	0	0	1	0	0	0	0		Canyon	1221	c	1	1-5cm	Canyonc	Canyon1-5cm
111_1334_0–1cm	127	10	7	2	0	5	0	0	0	0	0	0	0	0	0		Canyon	1221	c	2	0-1cm	Canyonc	Canyon0-1cm
111_1334_1–5cm	413	0	5	0	0	0	1	0	0	0	0	0	0	1	0		Canyon	1221	c	2	1-5cm	Canyonc	Canyon1-5cm
113_1341_0–1cm	135	12	16	0	0	1	0	0	0	0	0	0	0	0	0		Canyon	1222	c	1	0-1cm	Canyonc	Canyon0-1cm
113_1341_1–5cm	306	3	6	0	2	1	0	1	0	0	0	0	0	0	0		Canyon	1222	c	1	1-5cm	Canyonc	Canyon1-5cm
118_1386_0–1cm	158	19	12	1	3	0	0	1	0	0	0	0	0	1	0		Canyon	1083	b	1	0-1cm	Canyonb	Canyon0-1cm
118_1386_1–5cm	406	5	14	0	1	1	1	0	0	0	0	0	0	1	0		Canyon	1083	b	1	1-5cm	Canyonb	Canyon1-5cm
118_1387_0–1cm	526	19	17	1	1	6	0	0	0	1	0	0	0	1	0		Canyon	1083	b	2	0-1cm	Canyonb	Canyon0-1cm
118_1387_1–5cm	790	4	3	2	9	0	0	0	0	0	0	0	0	0	0		Canyon	1083	b	2	1-5cm	Canyonb	Canyon1-5cm
118_1388_0–1cm	260	25	29	1	3	0	0	0	1	0	0	0	0	3	0		Canyon	1083	b	3	0-1cm	Canyonb	Canyon0-1cm
118_1388_1–5cm	660	4	12	1	4	1	0	3	0	0	0	0	0	0	0		Canyon	1083	b	3	1-5cm	Canyonb	Canyon1-5cm
125_1467_0–1cm	166	28	19	1	2	0	0	0	0	0	0	0	0	0	0		Canyon	697	a	1	0-1cm	Canyona	Canyon0-1cm
125_1467_1–5cm	383	1	8	0	6	0	0	0	0	0	0	0	0	0	0		Canyon	697	a	1	1-5cm	Canyona	Canyon1-5cm
125_1466_0–1cm	102	31	29	3	4	1	0	0	0	0	0	0	0	1	0		Canyon	697	a	2	0-1cm	Canyona	Canyon0-1cm
125_1466_1–5cm	174	8	4	1	1	0	0	0	0	0	0	0	0	0	0		Canyon	697	a	2	1-5cm	Canyona	Canyon1-5cm
125_1465_0–1cm	125	25	13	2	2	1	0	0	0	0	1	0	0	4	0		Canyon	697	a	3	0-1cm	Canyona	Canyon0-1cm
125_1465_1–5cm	311	7	16	1	4	1	0	0	0	0	0	0	0	1	0		Canyon	697	a	3	1-5cm	Canyona	Canyon1-5cm
135_1555_0–1cm	139	9	9	0	1	2	0	0	0	0	0	0	0	1	0		Canyon	1523	d	1	0-1cm	Canyond	Canyon0-1cm
135_1555_1–5cm	267	1	0	0	3	1	0	0	0	0	0	0	0	0	0		Canyon	1523	d	1	1-5cm	Canyond	Canyon1-5cm
135_1554_0–1cm	61	5	0	0	1	0	0	0	0	0	0	0	0	1	0		Canyon	1523	d	2	0-1cm	Canyond	Canyon0-1cm
135_1554_1–5cm	220	0	1	0	3	0	0	2	0	0	0	0	0	0	0		Canyon	1523	d	2	1-5cm	Canyond	Canyon1-5cm
135_1552_0–1cm	89	12	5	1	1	0	0	0	0	0	0	0	0	0	0		Canyon	1523	d	3	0-1cm	Canyond	Canyon0-1cm
135_1552_1–5cm	141	1	1	0	0	0	0	0	0	0	0	0	0	0	0		Canyon	1523	d	3	1-5cm	Canyond	Canyon1-5cm
142_1591_0–1cm	161	6	9	1	8	0	0	0	0	0	0	0	0	1	0		Canyon	1200	c	1	0-1cm	Canyonc	Canyon0-1cm
142_1591_1–5cm	195	2	6	0	6	0	0	0	0	0	0	0	0	0	0		Canyon	1200	c	1	1-5cm	Canyonc	Canyon1-5cm
143_1597_0–1cm	155	18	14	1	3	1	0	0	0	0	0	0	0	3	0		Canyon	1202	c	1	0-1cm	Canyonc	Canyon0-1cm
143_1597_1–5cm	201	1	2	0	1	0	0	0	0	0	0	0	0	0	0		Canyon	1202	c	1	1-5cm	Canyonc	Canyon1-5cm
143_1596_0–1cm	320	19	13	0	0	0	2	0	0	0	0	0	0	3	0		Canyon	1202	c	2	0-1cm	Canyonc	Canyon0-1cm
143_1596_1–5cm	117	0	1	0	1	0	0	0	0	0	0	0	0	0	0		Canyon	1202	c	2	1-5cm	Canyonc	Canyon1-5cm
150_1692_0–1cm	223	7	15	0	2	0	0	0	1	0	0	0	0	0	0		Canyon	1017	b	1	0-1cm	Canyonb	Canyon0-1cm
150_1692_1–5cm	197	0	1	0	4	0	0	0	0	0	0	0	0	0	0		Canyon	1017	b	1	1-5cm	Canyonb	Canyon1-5cm
151_1696_0–1cm	183	13	13	0	4	0	1	0	0	0	0	0	0	0	0		Canyon	1023	b	1	0-1cm	Canyonb	Canyon0-1cm
151_1696_1–5cm	237	3	2	0	3	0	0	0	0	0	0	0	0	0	0		Canyon	1023	b	1	1-5cm	Canyonb	Canyon1-5cm
152_1703_0–1cm	597	0	16	0	5	2	1	0	0	0	0	0	0	0	0		Canyon	1031	b	1	0-1cm	Canyonb	Canyon0-1cm
152_1703_1–5cm	589	0	2	0	3	0	1	1	0	0	0	0	0	0	0		Canyon	1031	b	1	1-5cm	Canyonb	Canyon1-5cm
154_1733_0–1cm	92	9	10	0	2	0	0	1	0	0	0	0	0	1	0		Canyon	700	a	1	0-1cm	Canyona	Canyon0-1cm
154_1733_1–5cm	112	11	17	1	3	3	1	0	0	0	0	0	0	1	0		Canyon	700	a	1	1-5cm	Canyona	Canyon1-5cm
155_1736_0–1cm	112	12	20	0	3	0	1	0	0	0	0	0	0	0	0		Canyon	704	a	1	0-1cm	Canyona	Canyon0-1cm
155_1736_1–5cm	143	1	1	0	4	0	0	0	0	0	0	0	0	0	0		Canyon	704	a	1	1-5cm	Canyona	Canyon1-5cm
155_1738_0–1cm	168	30	29	0	3	4	0	0	0	0	0	0	0	3	0		Canyon	704	a	2	0-1cm	Canyona	Canyon0-1cm
155_1738_1–5cm	252	3	4	0	0	0	0	0	0	0	0	0	0	0	0		Canyon	704	a	2	1-5cm	Canyona	Canyon1-5cm
175_1987_0–1cm	156	17	11	1	1	0	0	0	0	0	0	0	0	0	0		Slope	1494	d	1	0-1cm	Sloped	Slope0-1cm
175_1987_1–5cm	365	9	9	0	2	0	0	0	0	0	0	0	0	0	0		Slope	1494	d	1	1-5cm	Sloped	Slope1-5cm
175_1983_0–1cm	257	27	21	4	1	2	0	0	0	0	0	0	0	0	0		Slope	1494	d	2	0-1cm	Sloped	Slope0-1cm
175_1983_1–5cm	334	2	6	0	4	0	0	1	0	0	0	0	0	0	0		Slope	1494	d	2	1-5cm	Sloped	Slope1-5cm
175_1981_0–1cm	259	22	28	2	3	2	0	2	1	0	0	0	0	1	0		Slope	1494	d	3	0-1cm	Sloped	Slope0-1cm
175_1981_1–5cm	292	3	9	0	1	0	0	1	0	0	0	0	0	0	0		Slope	1494	d	3	1-5cm	Sloped	Slope1-5cm
178_2026_0–1cm	145	11	14	0	2	0	0	0	0	0	0	0	0	0	0		Slope	1196	c	1	0-1cm	Slopec	Slope0-1cm
178_2026_1–5cm	191	5	4	0	2	0	0	0	0	0	0	0	0	0	0		Slope	1196	c	1	1-5cm	Slopec	Slope1-5cm
178_2025_0–1cm	262	8	16	0	0	0	0	1	0	0	0	0	0	0	0		Slope	1196	c	2	0-1cm	Slopec	Slope0-1cm
178_2025_1–5cm	158	30	42	1	1	4	0	1	0	0	0	0	1	0	0		Slope	1196	c	2	1-5cm	Slopec	Slope1-5cm
178_2027_0–1cm	123	11	22	1	5	0	0	0	0	0	0	0	0	1	0		Slope	1196	c	3	0-1cm	Slopec	Slope0-1cm
178_2027_1–5cm	180	2	8	0	1	0	0	0	0	0	0	0	0	0	0		Slope	1196	c	3	1-5cm	Slopec	Slope1-5cm
181_2054_0–1cm	100	5	5	0	3	3	1	0	0	0	0	0	0	0	0		Slope	998	b	1	0-1cm	Slopeb	Slope0-1cm
181_2054_1–5cm	229	1	5	1	1	0	0	0	0	0	0	0	0	0	0		Slope	998	b	1	1-5cm	Slopeb	Slope1-5cm
181_2051_0–1cm	178	23	15	0	2	3	0	0	0	0	0	0	0	0	0		Slope	998	b	2	0-1cm	Slopeb	Slope0-1cm
181_2051_1–5cm	214	1	3	0	0	0	0	1	0	0	0	0	0	0	0		Slope	998	b	2	1-5cm	Slopeb	Slope1-5cm
181_2055_0–1cm	237	16	19	0	2	1	0	0	0	0	0	0	0	0	0		Slope	998	b	3	0-1cm	Slopeb	Slope0-1cm
181_2055_1–5cm	174	1	7	1	1	1	0	0	0	0	0	0	0	0	0		Slope	998	b	3	1-5cm	Slopeb	Slope1-5cm
185_2075_0–1cm	126	34	36	2	7	1	0	0	0	0	0	0	0	0	0		Slope	726	a	1	0-1cm	Slopea	Slope0-1cm
185_2075_1–5cm	191	1	7	0	1	0	0	0	0	0	0	0	0	0	0		Slope	726	a	1	1-5cm	Slopea	Slope1-5cm
185_2074_0–1cm	169	20	46	0	2	6	1	1	0	0	0	0	0	3	0		Slope	726	a	2	0-1cm	Slopea	Slope0-1cm
185_2074_1–5cm	266	5	4	0	2	0	0	0	0	0	0	0	0	0	0		Slope	726	a	2	1-5cm	Slopea	Slope1-5cm
185_2071_0–1cm	175	41	23	0	2	5	0	0	4	0	0	0	0	2	0		Slope	726	a	3	0-1cm	Slopea	Slope0-1cm
185_2071_1–5cm	367	10	10	0	4	0	1	0	0	0	0	0	0	0	0		Slope	726	a	3	1-5cm	Slopea	Slope1-5cm

## Sheet: Spatial covariates (BoP)
	Lat	Long
2_3_0–1cm	-37.169	176.66
2_3_1–5cm	-37.169	176.66
2_4_0–1cm	-37.169	176.66
2_4_1–5cm	-37.169	176.66
2_6_0–1cm	-37.169	176.66
2_6_1–5cm	-37.169	176.66
5_45_0–1cm	-37.1123	176.731
5_45_1–5cm	-37.1123	176.731
5_47_0–1cm	-37.1123	176.731
5_47_1–5cm	-37.1123	176.731
5_48_0–1cm	-37.1123	176.731
5_48_1–5cm	-37.1123	176.731
9_82_0–1cm	-37.058	176.806
9_82_1–5cm	-37.058	176.806
9_85_0–1cm	-37.058	176.806
9_85_1–5cm	-37.058	176.806
9_86_0–1cm	-37.058	176.806
9_86_1–5cm	-37.058	176.806
13_102_0–1cm	-36.9225	176.979
13_102_1–5cm	-36.9225	176.979
13_105_0–1cm	-36.9225	176.979
13_105_1–5cm	-36.9225	176.979
13_106_0–1cm	-36.9225	176.979
13_106_1–5cm	-36.9225	176.979
42_454_0–1cm	-37.2417	177.631
42_454_1–5cm	-37.2417	177.631
42_451_0–1cm	-37.2417	177.631
42_451_1–5cm	-37.2417	177.631
44_504_0–1cm	-37.3658	177.626
44_504_1–5cm	-37.3658	177.626
44_502_0–1cm	-37.3658	177.626
44_502_1–5cm	-37.3658	177.626
44_508_0–1cm	-37.3658	177.626
44_508_1–5cm	-37.3658	177.626
49_535_0–1cm	-37.4317	177.626
49_535_1–5cm	-37.4317	177.626
49_537_0–1cm	-37.4317	177.626
49_537_1–5cm	-37.4317	177.626
49_538_0–1cm	-37.4317	177.626
49_538_1–5cm	-37.4317	177.626
52_566_0–1cm	-37.5043	177.62
52_566_1–5cm	-37.5043	177.62
52_567_0–1cm	-37.5043	177.62
52_567_1–5cm	-37.5043	177.62
52_565_0–1cm	-37.5043	177.62
52_565_1–5cm	-37.5043	177.62
55_618_0–1cm	-37.4308	177.894
55_618_1–5cm	-37.4308	177.894
55_614_0–1cm	-37.4308	177.894
55_614_1–5cm	-37.4308	177.894
55_616_0–1cm	-37.4308	177.894
55_616_1–5cm	-37.4308	177.894
60_661_0–1cm	-37.4028	177.877
60_661_1–5cm	-37.4028	177.877
60_662_0–1cm	-37.4028	177.877
60_662_1–5cm	-37.4028	177.877
61_666_0–1cm	-37.4033	177.878
61_666_1–5cm	-37.4033	177.878
65_711_0–1cm	-37.3643	177.876
65_711_1–5cm	-37.3643	177.876
66_717_0–1cm	-37.3643	177.876
66_717_1–5cm	-37.3643	177.876
66_719_0–1cm	-37.3643	177.876
66_719_1–5cm	-37.3643	177.876
70_781_0–1cm	-37.3022	177.871
70_781_1–5cm	-37.3022	177.871
70_785_0–1cm	-37.3022	177.871
70_785_1–5cm	-37.3022	177.871
70_787_0–1cm	-37.3022	177.871
70_787_1–5cm	-37.3022	177.871
105_1281_0–1cm	-37.1892	176.943
105_1281_1–5cm	-37.1892	176.943
105_1286_0–1cm	-37.1892	176.943
105_1286_1–5cm	-37.1892	176.943
105_1287_0–1cm	-37.1892	176.943
105_1287_1–5cm	-37.1892	176.943
111_1333_0–1cm	-37.2508	176.967
111_1333_1–5cm	-37.2508	176.967
111_1334_0–1cm	-37.2508	176.967
111_1334_1–5cm	-37.2508	176.967
113_1341_0–1cm	-37.251	176.966
113_1341_1–5cm	-37.251	176.966
118_1386_0–1cm	-37.3333	176.962
118_1386_1–5cm	-37.3333	176.962
118_1387_0–1cm	-37.3333	176.962
118_1387_1–5cm	-37.3333	176.962
118_1388_0–1cm	-37.3333	176.962
118_1388_1–5cm	-37.3333	176.962
125_1467_0–1cm	-37.4747	176.758
125_1467_1–5cm	-37.4747	176.758
125_1466_0–1cm	-37.4747	176.758
125_1466_1–5cm	-37.4747	176.758
125_1465_0–1cm	-37.4747	176.758
125_1465_1–5cm	-37.4747	176.758
135_1555_0–1cm	-37.4432	177.351
135_1555_1–5cm	-37.4432	177.351
135_1554_0–1cm	-37.4432	177.351
135_1554_1–5cm	-37.4432	177.351
135_1552_0–1cm	-37.4432	177.351
135_1552_1–5cm	-37.4432	177.351
142_1591_0–1cm	-37.5292	177.295
142_1591_1–5cm	-37.5292	177.295
143_1597_0–1cm	-37.5295	177.295
143_1597_1–5cm	-37.5295	177.295
143_1596_0–1cm	-37.5295	177.295
143_1596_1–5cm	-37.5295	177.295
150_1692_0–1cm	-37.5523	177.27
150_1692_1–5cm	-37.5523	177.27
151_1696_0–1cm	-37.5533	177.268
151_1696_1–5cm	-37.5533	177.268
152_1703_0–1cm	-37.5528	177.268
152_1703_1–5cm	-37.5528	177.268
154_1733_0–1cm	-37.6175	177.224
154_1733_1–5cm	-37.6175	177.224
155_1736_0–1cm	-37.6173	177.225
155_1736_1–5cm	-37.6173	177.225
155_1738_0–1cm	-37.6173	177.225
155_1738_1–5cm	-37.6173	177.225
175_1987_0–1cm	-37.261	178.004
175_1987_1–5cm	-37.261	178.004
175_1983_0–1cm	-37.261	178.004
175_1983_1–5cm	-37.261	178.004
175_1981_0–1cm	-37.261	178.004
175_1981_1–5cm	-37.261	178.004
178_2026_0–1cm	-37.3168	178.024
178_2026_1–5cm	-37.3168	178.024
178_2025_0–1cm	-37.3168	178.024
178_2025_1–5cm	-37.3168	178.024
178_2027_0–1cm	-37.3168	178.024
178_2027_1–5cm	-37.3168	178.024
181_2054_0–1cm	-37.3427	178.029
181_2054_1–5cm	-37.3427	178.029
181_2051_0–1cm	-37.3427	178.029
181_2051_1–5cm	-37.3427	178.029
181_2055_0–1cm	-37.3427	178.029
181_2055_1–5cm	-37.3427	178.029
185_2075_0–1cm	-37.3807	178.032
185_2075_1–5cm	-37.3807	178.032
185_2074_0–1cm	-37.3807	178.032
185_2074_1–5cm	-37.3807	178.032
185_2071_0–1cm	-37.3807	178.032
185_2071_1–5cm	-37.3807	178.032
