# Supplementary material for: Differences in meiofauna communities with sediment depth are greater than habitat effects on the New Zealand continental margin: implications for vulnerability to anthropogenic disturbance
Source: PeerJ. 2016 Jul 5;4:e2154. doi: 10.7717/peerj.2154 (PMC4941793; doi:10.7717/peerj.2154)
Supplement: Supplemental Information 10 [file peerj-04-2154-s010.xlsx]

## Sheet: Hikurangi Margin (HIK) 0-1cm
Sites	Nematoda	Nauplii	Copepoda	Ostracoda	Annelida	Kinorhyncha	Isopoda	Tanaidacea	Amphipoda	Cumacea	Aplacophora	Bivalvia		Habitat	Water depth	Strata	Core
4_4	252	33	70	2	9	10	0	0	1	0	0	0		Slope	1046	b	1
4_5	240	58	62	7	4	6	1	1	0	0	0	0		Slope	1046	b	2
4_7	359	68	61	2	4	3	1	0	0	0	0	0		Slope	1046	b	3
10_6	277	20	27	3	4	2	0	0	0	0	0	0		Slope	1561	d	1
10_8	218	10	25	0	2	2	0	0	0	0	0	0		Slope	1563	d	2
12_3	607	87	151	10	32	5	1	1	0	0	0	5		Canyon	1350	d	1
12_4	429	35	54	0	8	1	0	1	0	0	0	0		Canyon	1350	d	2
12_8	257	68	67	4	9	7	0	2	1	0	0	0		Canyon	1350	d	3
17_3	357	55	43	0	4	1	0	0	0	0	0	0		Slope	1514	d	1
17_8	133	19	18	3	1	1	1	1	1	0	0	0		Slope	1514	d	2
19_3	278	54	58	3	2	0	0	7	0	0	0	0		Slope	1553	d	1
22_1	269	70	47	6	3	4	0	0	0	0	0	0		Canyon	1188	c	1
22_2	270	24	31	2	8	5	0	0	0	0	0	0		Canyon	1188	c	2
22_5	240	48	41	0	9	7	0	2	0	0	0	0		Canyon	1188	c	3
27_4	169	48	65	3	2	15	0	0	0	0	0	1		Canyon	1013	b	1
27_6	377	68	76	9	4	14	0	1	0	0	0	3		Canyon	1013	b	2
27_8	453	84	139	7	9	25	0	1	1	0	0	5		Canyon	1013	b	3
31_1	202	29	29	7	2	3	0	0	1	0	0	0		Canyon	730	a	1
31_2	153	25	18	4	4	8	0	0	0	0	0	0		Canyon	730	a	2
31_3	108	6	5	2	2	2	0	0	0	0	0	0		Canyon	730	a	3
38_2	396	74	91	10	10	9	4	1	1	1	0	0		Slope	1121	c	1
38_3	197	55	50	3	8	5	0	0	0	0	0	0		Slope	1121	c	2
38_4	232	14	14	0	1	0	0	0	0	0	0	0		Slope	1121	c	3
41_1	156	4	11	0	1	2	0	0	0	0	0	0		Slope	942	b	1
41_3	65	5	5	1	0	1	0	0	0	0	0	0		Slope	942	b	2
41_8	293	24	31	4	3	2	0	1	0	0	0	0		Slope	942	b	3
44_4	257	13	32	0	3	1	0	2	0	0	0	0		Slope	728	a	1
44_5	113	8	20	1	1	0	0	0	0	0	0	0		Slope	728	a	2
44_7	202	24	62	0	7	7	0	0	3	0	0	0		Slope	728	a	3
53_3	187	8	20	0	3	1	0	0	0	0	2	0		Canyon	948	b	1
58_3	173	11	30	1	1	5	0	0	1	0	0	0		Canyon	670	a	1
58_6	221	15	30	2	5	2	0	0	0	0	0	0		Canyon	670	a	2
58_7	107	6	11	0	1	3	0	0	0	0	0	0		Canyon	670	a	3
62_6	172	13	23	0	9	4	0	0	0	0	0	0		Canyon	1171	b	1
62_7	207	49	71	4	9	7	1	0	0	0	0	0		Canyon	1171	b	2
62_8	144	12	43	6	6	3	0	0	0	0	0	0		Canyon	1171	b	3
69_1	134	30	24	1	2	5	0	0	0	0	0	0		Seamount	670	a	1
69_2	168	7	16	0	10	0	0	0	0	0	0	0		Seamount	670	a	2
69_5	155	23	43	0	0	6	0	1	0	0	0	0		Seamount	670	a	3
72_1	107	13	23	0	6	2	0	1	0	0	0	0		Seamount	985	b	1
72_4	300	5	7	0	5	2	0	0	0	0	0	0		Seamount	985	b	2
72_8	60	3	16	3	1	2	0	0	0	0	0	0		Seamount	985	b	3
76_4	401	85	129	6	9	11	0	3	0	0	0	0		Slope	1282	b	1
76_5	279	49	82	4	3	10	1	4	0	0	0	1		Slope	1282	b	2
92_2	304	36	27	0	9	0	1	0	0	1	0	0		Canyon	683	a	1
92_4	174	4	41	0	1	1	0	0	0	1	0	0		Canyon	683	a	2
97_1	413	0	4	0	6	0	0	1	0	0	0	0		Canyon	1011	b	1
98_1	325	7	8	0	3	1	0	0	0	0	0	0		Canyon	1012	b	1
98_2	161	2	11	0	6	1	0	0	0	0	0	0		Canyon	1012	b	2
124_4	295	34	32	0	2	8	0	0	0	0	0	0		Slope	690	a	1
124_7	384	31	31	3	4	4	0	0	0	0	0	0		Slope	690	a	2
126_1	271	13	14	1	1	1	0	0	1	0	0	0		Canyon	1495	d	1
126_3	285	23	35	1	1	1	0	2	0	0	0	0		Canyon	1495	d	2
126_6	353	28	29	0	7	9	1	0	0	0	0	0		Canyon	1495	d	3
127_3	254	3	15	1	0	0	0	0	1	0	0	0		Canyon	1177	c	1
128_3	231	26	38	2	5	2	0	2	0	0	0	0		Slope	1420	d	1
129_6	380	11	17	0	5	2	0	2	0	0	0	0		Seamount	1456	d	1
130_4	213	1	11	3	7	5	0	0	1	0	1	0		Seamount	894	b	1
132_1	230	13	24	0	4	7	0	2	0	0	0	0		Seamount	1453	d	1

## Sheet: HIK 1-5cm
Sites	Nematoda	Nauplii	Copepoda	Ostracoda	Annelida	Kinorhyncha	Isopoda	Tanaidacea	Amphipoda	Cumacea	Aplacophora	Bivalvia		Habitat	Water depth	Strata	Core
4_4	500	1	16	0	9	3	0	0	0	0	0	0		Slope	1046	b	1
4_5	551	3	15	0	7	4	1	0	0	0	0	0		Slope	1046	b	2
4_7	474	9	28	3	12	4	0	0	0	0	0	0		Slope	1046	b	3
10_6	366	9	18	2	5	0	0	0	0	0	0	0		Slope	1562	d	1
10_8	310	29	19	1	2	2	2	0	0	0	0	0		Slope	1564	d	2
12_3	134	0	4	0	9	1	0	1	0	0	0	0		Canyon	1350	d	1
12_4	235	2	1	0	16	0	0	1	0	0	0	0		Canyon	1350	d	2
12_8	318	28	32	1	5	4	1	2	1	6	0	0		Canyon	1350	d	3
17_3	170	2	5	0	2	0	0	0	0	0	0	0		Slope	1514	d	1
17_8	334	1	10	0	4	0	1	0	0	0	0	0		Slope	1514	d	2
19_3	200	4	15	0	9	0	0	0	0	0	0	0		Slope	1553	d	1
22_1	434	16	12	2	16	0	0	1	0	0	0	1		Canyon	1188	c	1
22_2	344	0	5	1	4	0	0	0	0	0	0	0		Canyon	1188	c	2
22_5	502	10	20	2	6	2	0	2	0	0	0	0		Canyon	1188	c	3
27_4	689	50	82	12	32	7	0	2	1	0	0	2		Canyon	1013	b	1
27_6	443	9	10	0	11	2	0	2	0	0	0	3		Canyon	1013	b	2
27_8	664	2	8	1	16	5	0	0	0	0	0	0		Canyon	1013	b	3
31_1	615	3	9	0	25	4	0	0	0	0	0	0		Canyon	730	a	1
31_2	1045	39	60	3	30	7	0	0	0	0	0	0		Canyon	730	a	2
31_3	1213	18	33	3	34	7	0	1	0	0	0	0		Canyon	730	a	3
38_2	471	4	25	1	8	0	0	0	0	0	0	0		Slope	1121	c	1
38_3	425	32	40	2	6	4	0	1	0	0	0	0		Slope	1121	c	2
38_4	42	18	22	0	1	1	0	0	0	0	0	0		Slope	1121	c	3
41_1	187	1	0	0	0	0	0	0	0	0	0	0		Slope	942	b	1
41_3	430	25	27	0	8	5	0	0	0	0	0	0		Slope	942	b	2
41_8	278	2	6	1	2	1	0	1	0	0	0	0		Slope	942	b	3
44_4	480	3	7	0	5	0	0	0	0	0	0	0		Slope	728	a	1
44_5	351	12	59	1	3	4	0	0	2	0	0	0		Slope	728	a	2
44_7	462	12	38	0	9	3	1	0	0	0	0	0		Slope	728	a	3
53_3	126	1	3	0	2	0	0	0	0	0	0	0		Canyon	948	b	1
58_3	990	67	74	0	18	18	1	2	1	0	0	0		Canyon	670	a	1
58_6	1074	12	21	1	10	3	1	1	0	0	0	0		Canyon	670	a	2
58_7	962	35	84	0	16	12	0	2	3	1	0	0		Canyon	670	a	3
62_6	338	13	38	0	17	3	0	0	0	0	0	0		Canyon	1171	c	1
62_7	473	11	15	0	12	8	0	1	0	0	0	0		Canyon	1171	c	2
62_8	217	0	9	0	7	0	0	1	0	0	0	0		Canyon	1171	c	3
69_1	381	10	22	1	10	5	0	1	1	0	0	0		Seamount	670	a	1
69_2	230	0	0	0	5	0	0	0	0	0	0	0		Seamount	670	a	2
69_5	424	5	14	0	9	0	0	0	0	0	0	0		Seamount	670	a	3
72_1	309	7	20	0	2	1	0	0	0	0	0	0		Seamount	985	b	1
72_4	103	16	35	1	5	4	0	1	1	0	0	0		Seamount	985	b	2
72_8	216	0	2	0	1	1	0	0	0	0	0	0		Seamount	985	b	3
76_4	335	5	7	2	6	1	0	0	0	0	0	0		Slope	1282	c	1
76_5	154	4	17	0	14	2	8	2	0	0	0	0		Slope	1282	c	2
92_2	388	3	13	0	9	0	0	1	0	0	0	0		Canyon	683	a	1
92_4	546	1	14	0	17	0	0	0	0	0	0	0		Canyon	683	a	2
97_1	342	8	32	0	12	2	0	0	0	0	0	1		Canyon	1011	b	1
98_1	334	0	3	0	3	0	0	0	0	0	0	0		Canyon	1012	b	1
98_2	277	0	1	0	1	0	0	1	0	0	0	0		Canyon	1012	b	2
124_4	377	10	18	0	3	2	0	0	0	0	0	0		Slope	690	a	1
124_7	458	3	9	0	6	2	0	0	0	0	0	0		Slope	690	a	2
126_1	575	1	4	0	3	0	0	0	0	0	0	0		Canyon	1495	d	1
126_3	458	5	6	1	11	2	0	0	0	0	0	0		Canyon	1495	d	2
126_6	418	3	8	0	6	1	0	0	0	0	0	0		Canyon	1495	d	3
127_3	435	3	0	0	1	0	0	0	0	0	0	0		Canyon	1177	c	1
128_3	221	2	9	0	10	0	0	1	0	0	0	0		Slope	1420	d	1
129_6	299	4	9	0	10	0	0	0	0	0	0	0		Seamount	1456	d	1
130_4	188	1	4	0	9	0	0	0	0	0	0	0		Seamount	894	b	1
132_1	180	0	1	0	6	0	1	0	0	0	0	0		Seamount	1453	d	1

## Sheet: Envir. variables (HIK)
	Lat	Lon	Depth	%CaCO3 (0-5cm)	% TOM (0-1cm)	POC % (surface)	Phaeo ug/g	MEAN	SKEWNESS	KURTOSIS	Sediment H'10	Fishing effort (tows)	vrm05_1	STD15_1	STD07_1	STD05_1	slope_STD15_1	slope_STD03_1	slope_1	Range07_1	Range05_1	profile_curvature_1	curvature_1	aspect_1	Mean chlorophyll concentration (mg chlorophyll m-3)		Habitat
4_4	41.6837	175.664	1046	2.09582	5.42005	1.03	19.1	11.949	0.296048	2.70273	0.766529	1	0.000126183	5.99896	3.14451	2.2114	0.726127	0.486969	2.77553	12.7968	9.36951	-0.0320399	-0.0126758	296.713	0.5705		Slope
4_5	41.6837	175.664	1046	2.09582	5.42005	1.03	19.1	11.949	0.296048	2.70273	0.766529	1	0.000126183	5.99896	3.14451	2.2114	0.726127	0.486969	2.77553	12.7968	9.36951	-0.0320399	-0.0126758	296.713	0.5705		Slope
4_7	41.6837	175.664	1046	2.09582	5.42005	1.03	19.1	11.949	0.296048	2.70273	0.766529	1	0.000126183	5.99896	3.14451	2.2114	0.726127	0.486969	2.77553	12.7968	9.36951	-0.0320399	-0.0126758	296.713	0.5705		Slope
10_6	41.717	175.675	1561	3.63285	8.21067	1.3	20.7	9.62021	0.375465	3.01411	0.714909	0	0.00248331	20.0584	8.37128	5.35742	4.19294	1.84821	7.63881	30.4462	17.3224	-0.0424172	0.0634375	359.087	0.5705		Slope
10_8	41.717	175.675	1561	3.63285	8.21067	1.3	20.7	9.62021	0.375465	3.01411	0.714909	0	0.00248331	20.0584	8.37128	5.35742	4.19294	1.84821	7.63881	30.4462	17.3224	-0.0424172	0.0634375	359.087	0.5705		Slope
12_3	41.5508	175.725	1350	2.20563	5.57941	1.24	32.5	9.10029	0.0831088	2.28465	0.70128	0	0.000342488	6.09902	2.98722	2.36943	1.04109	0.498453	3.65408	11.7511	8.63782	-0.385397	-0.547402	291.045	0.6135		Canyon
12_4	41.5508	175.725	1350	2.20563	5.57941	1.24	32.5	9.10029	0.0831088	2.28465	0.70128	0	0.000342488	6.09902	2.98722	2.36943	1.04109	0.498453	3.65408	11.7511	8.63782	-0.385397	-0.547402	291.045	0.6135		Canyon
12_8	41.5508	175.725	1350	2.20563	5.57941	1.24	32.5	9.10029	0.0831088	2.28465	0.70128	0	0.000342488	6.09902	2.98722	2.36943	1.04109	0.498453	3.65408	11.7511	8.63782	-0.385397	-0.547402	291.045	0.6135		Canyon
17_3	41.6288	175.868	1514	4.5632	6.61133	1.24	13.5	8.95034	0.34086	2.67153	0.717451	28	0.000535905	14.2385	6.5349	5.09891	1.06735	1.44699	9.0536	21.1323	16.4226	-0.0587721	0.185176	346.04	0.5615		Slope
17_8	41.6288	175.868	1514	4.5632	6.61133	1.24	13.5	8.95034	0.34086	2.67153	0.717451	28	0.000535905	14.2385	6.5349	5.09891	1.06735	1.44699	9.0536	21.1323	16.4226	-0.0587721	0.185176	346.04	0.5615		Slope
19_3	41.627	175.864	1553	4.5632	6.61133	1.24	18.8	8.95034	0.34086	2.67153	0.717451	26	0.000878274	15.7338	7.90524	6.1968	1.40009	1.71786	10.1027	29.4567	22.5948	0.181772	-0.0791016	332.948	0.5615		Slope
22_1	41.51	175.719	1188	3.90505	7.23725	1.18	43.9	10.6577	0.22535	2.59194	0.732718	1	0.000466824	9.94996	3.97863	3.06335	1.94325	0.45403	4.37026	14.8696	11.4696	-0.680393	-0.882441	357.507	0.6135		Canyon
22_2	41.51	175.719	1188	3.90505	7.23725	1.18	43.9	10.6577	0.22535	2.59194	0.732718	1	0.000466824	9.94996	3.97863	3.06335	1.94325	0.45403	4.37026	14.8696	11.4696	-0.680393	-0.882441	357.507	0.6135		Canyon
22_5	41.51	175.719	1188	3.90505	7.23725	1.18	43.9	10.6577	0.22535	2.59194	0.732718	1	0.000466824	9.94996	3.97863	3.06335	1.94325	0.45403	4.37026	14.8696	11.4696	-0.680393	-0.882441	357.507	0.6135		Canyon
27_4	41.4983	175.704	1013	2.48591	7.11509	1.15	37	9.80523	0.226126	2.49894	0.738965	1	0.00152773	17.1414	7.24351	4.91227	4.02825	1.06855	8.53374	33.114	16.3788	-0.377415	-1.03422	306.085	0.6622		Canyon
27_6	41.4983	175.704	1013	2.48591	7.11509	1.15	37	9.80523	0.226126	2.49894	0.738965	1	0.00152773	17.1414	7.24351	4.91227	4.02825	1.06855	8.53374	33.114	16.3788	-0.377415	-1.03422	306.085	0.6622		Canyon
27_8	41.4983	175.704	1013	2.48591	7.11509	1.15	37	9.80523	0.226126	2.49894	0.738965	1	0.00152773	17.1414	7.24351	4.91227	4.02825	1.06855	8.53374	33.114	16.3788	-0.377415	-1.03422	306.085	0.6622		Canyon
31_1	41.4962	175.683	730	4.68856	5.45658	1.11	40.6	16.9936	0.462714	2.33879	0.854499	1	0.0181834	28.4064	15.5975	12.7523	5.95541	3.81974	22.5238	61.2012	46.7728	-0.277055	-0.41126	220.156	0.6622		Canyon
31_2	41.4962	175.683	730	4.68856	5.45658	1.11	40.6	16.9936	0.462714	2.33879	0.854499	1	0.0181834	28.4064	15.5975	12.7523	5.95541	3.81974	22.5238	61.2012	46.7728	-0.277055	-0.41126	220.156	0.6622		Canyon
31_3	41.4962	175.683	730	4.68856	5.45658	1.11	40.6	16.9936	0.462714	2.33879	0.854499	1	0.0181834	28.4064	15.5975	12.7523	5.95541	3.81974	22.5238	61.2012	46.7728	-0.277055	-0.41126	220.156	0.6622		Canyon
38_2	41.5937	175.853	1121	5.14442	8.02527	0.93	13.1	9.68726	0.373544	2.46968	0.763755	70	0.000641882	11.7803	5.51809	3.73628	2.73839	1.14712	5.69811	20.5897	12.3179	-0.0983812	-0.0246875	346.124	0.5615		Slope
38_3	41.5937	175.853	1121	5.14442	8.02527	0.93	13.1	9.68726	0.373544	2.46968	0.763755	70	0.000641882	11.7803	5.51809	3.73628	2.73839	1.14712	5.69811	20.5897	12.3179	-0.0983812	-0.0246875	346.124	0.5615		Slope
38_4	41.5937	175.853	1121	5.14442	8.02527	0.93	13.1	9.68726	0.373544	2.46968	0.763755	70	0.000641882	11.7803	5.51809	3.73628	2.73839	1.14712	5.69811	20.5897	12.3179	-0.0983812	-0.0246875	346.124	0.5615		Slope
41_1	41.5475	175.84	942	3.82903	8.06633	1.1	13.3	8.58986	0.292567	2.60516	0.714769	11	0.000126243	7.25731	3.20132	2.27984	0.695037	0.856369	3.94113	13.4137	8.9715	0.252891	0.492539	289.896	0.5765		Slope
41_3	41.5475	175.84	942	3.82903	8.06633	1.1	13.3	8.58986	0.292567	2.60516	0.714769	11	0.000126243	7.25731	3.20132	2.27984	0.695037	0.856369	3.94113	13.4137	8.9715	0.252891	0.492539	289.896	0.5765		Slope
41_8	41.5475	175.84	942	3.82903	8.06633	1.1	13.3	8.58986	0.292567	2.60516	0.714769	11	0.000126243	7.25731	3.20132	2.27984	0.695037	0.856369	3.94113	13.4137	8.9715	0.252891	0.492539	289.896	0.5765		Slope
44_4	41.5258	175.8	728	1.88391	7.58913	1.19	21.4	9.90993	0.264293	2.4554	0.740139	89	0.00450104	8.93503	4.14845	3.36143	4.09174	3.31561	6.01897	19.2776	14.6232	0.0151151	-0.703066	2.79241	0.5765		Slope
44_5	41.5258	175.8	728	1.88391	7.58913	1.19	21.4	9.90993	0.264293	2.4554	0.740139	89	0.00450104	8.93503	4.14845	3.36143	4.09174	3.31561	6.01897	19.2776	14.6232	0.0151151	-0.703066	2.79241	0.5765		Slope
44_7	41.5258	175.8	728	1.88391	7.58913	1.19	21.4	9.90993	0.264293	2.4554	0.740139	89	0.00450104	8.93503	4.14845	3.36143	4.09174	3.31561	6.01897	19.2776	14.6232	0.0151151	-0.703066	2.79241	0.5765		Slope
53_3	41.4563	175.897	948	3.25467	4.5906	0.92	14.9	19.229	0.665681	2.82718	0.882257	3	0.0010938	10.017	4.28608	2.92963	2.99696	1.43206	4.01521	18.489	11.4921	0.0846086	0.329023	355.245	0.61		Canyon
58_3	41.408	175.898	670	2.25835	5.17995	1.15	32.6	11.3622	0.465758	2.69388	0.791124	16	0.000834644	18.9107	1.87858	1.12808	10.6212	0.326338	2.46085	10.5771	3.70428	-0.00425858	-0.045625	1.11975	0.6411		Canyon
58_6	41.408	175.898	670	2.25835	5.17995	1.15	32.6	11.3622	0.465758	2.69388	0.791124	16	0.000834644	18.9107	1.87858	1.12808	10.6212	0.326338	2.46085	10.5771	3.70428	-0.00425858	-0.045625	1.11975	0.6411		Canyon
58_7	41.408	175.898	670	2.25835	5.17995	1.15	32.6	11.3622	0.465758	2.69388	0.791124	16	0.000834644	18.9107	1.87858	1.12808	10.6212	0.326338	2.46085	10.5771	3.70428	-0.00425858	-0.045625	1.11975	0.6411		Canyon
62_6	41.476	175.948	1171	3.4637	7.40265	1	17.3	10.8723	0.28942	2.55317	0.746308	1	0.000418842	9.84889	4.78851	3.53817	2.52685	0.523109	5.45858	19.9359	12.1796	0.0904692	0.146445	328.12	0.61		Canyon
62_7	41.476	175.948	1171	3.4637	7.40265	1	17.3	10.8723	0.28942	2.55317	0.746308	1	0.000418842	9.84889	4.78851	3.53817	2.52685	0.523109	5.45858	19.9359	12.1796	0.0904692	0.146445	328.12	0.61		Canyon
62_8	41.476	175.948	1171	3.4637	7.40265	1	17.3	10.8723	0.28942	2.55317	0.746308	1	0.000418842	9.84889	4.78851	3.53817	2.52685	0.523109	5.45858	19.9359	12.1796	0.0904692	0.146445	328.12	0.61		Canyon
69_1	41.3353	176.188	670	3.81075	4.71903	0.66	11.1	30.9118	0.105422	1.71898	0.933188	546	7.14064e-05	19.6731	9.57021	6.7359	1.10522	0.21639	10.6704	37.2466	24.7796	0.0457817	-0.00249023	337.843	0.5301		Smt
69_2	41.3353	176.188	670	3.81075	4.71903	0.66	11.1	30.9118	0.105422	1.71898	0.933188	546	7.14064e-05	19.6731	9.57021	6.7359	1.10522	0.21639	10.6704	37.2466	24.7796	0.0457817	-0.00249023	337.843	0.5301		Smt
69_5	41.3353	176.188	670	3.81075	4.71903	0.66	11.1	30.9118	0.105422	1.71898	0.933188	546	7.14064e-05	19.6731	9.57021	6.7359	1.10522	0.21639	10.6704	37.2466	24.7796	0.0457817	-0.00249023	337.843	0.5301		Smt
72_1	41.3657	176.196	985	4.16767	6.48607	0.72	13.4	8.98779	0.133945	2.40755	0.69875	8	0.000145197	6.44949	2.99361	2.10203	0.766535	0.648413	3.87043	12.7908	9.44202	0.0370119	0.0993945	342.35	0.5301		Smt
72_4	41.3657	176.196	985	4.16767	6.48607	0.72	13.4	8.98779	0.133945	2.40755	0.69875	8	0.000145197	6.44949	2.99361	2.10203	0.766535	0.648413	3.87043	12.7908	9.44202	0.0370119	0.0993945	342.35	0.5301		Smt
72_8	41.3657	176.196	985	4.16767	6.48607	0.72	13.4	8.98779	0.133945	2.40755	0.69875	8	0.000145197	6.44949	2.99361	2.10203	0.766535	0.648413	3.87043	12.7908	9.44202	0.0370119	0.0993945	342.35	0.5301		Smt
76_4	41.6833	175.65	1282	3.40126	5.4815	1.16	18.4	9.65566	0.0837424	2.34334	0.706322	2	0.00126195	22.9834	11.8709	8.98864	1.69361	0.62486	15.4052	40.9796	27.8259	0.103064	0.224785	1.84046	0.5705		Slope
76_5	41.6833	175.65	1282	3.40126	5.4815	1.16	18.4	9.65566	0.0837424	2.34334	0.706322	2	0.00126195	22.9834	11.8709	8.98864	1.69361	0.62486	15.4052	40.9796	27.8259	0.103064	0.224785	1.84046	0.5705		Slope
92_2	41.8922	174.635	683	4.71974	5.71092	1.03	19.1	13.3938	0.344471	2.45811	0.807135	10	0.000752091	15.613	4.88105	3.50905	7.42948	0.561874	6.64436	23.9558	14.3823	0.0558057	0.11084	45.6891	0.7678		Canyon
92_4	41.8922	174.635	683	4.71974	5.71092	1.03	19.1	13.3938	0.344471	2.45811	0.807135	10	0.000752091	15.613	4.88105	3.50905	7.42948	0.561874	6.64436	23.9558	14.3823	0.0558057	0.11084	45.6891	0.7678		Canyon
97_1	41.9458	174.617	1011	5.32929	6.0203	1.03	25.3	12.7004	0.351853	2.31668	0.815765	13	0.000173628	8.44598	4.0093	2.96091	1.72797	0.668969	4.91857	13.4889	9.30957	-0.145948	-0.333213	80.7001	0.7848		Canyon
98_1	41.9277	174.617	1012	5.32929	6.0203	1.03	17.9	12.7004	0.351853	2.31668	0.815765	13	0.00118738	15.3925	6.53351	4.52263	4.97546	1.88815	7.04386	30.4819	18.7152	0.219548	0.643125	324.677	0.7848		Canyon
98_2	41.9277	174.617	1012	5.32929	6.0203	1.03	17.9	12.7004	0.351853	2.31668	0.815765	13	0.00118738	15.3925	6.53351	4.52263	4.97546	1.88815	7.04386	30.4819	18.7152	0.219548	0.643125	324.677	0.7848		Canyon
124_4	41.986	174.697	693	2.03	5.02464	0.53	6.44	21.8934	0.396714	2.01985	0.940957	12	0.000200093	6.4954	3.2683	2.30483	1.03236	0.464565	3.4938	11.6818	8.43768	-0.00758364	-0.200908	27.4347	0.7683		Slope
124_7	41.986	174.697	693	2.03	5.02464	0.53	6.44	21.8934	0.396714	2.01985	0.940957	12	0.000200093	6.4954	3.2683	2.30483	1.03236	0.464565	3.4938	11.6818	8.43768	-0.00758364	-0.200908	27.4347	0.7683		Slope
126_1	42.1422	174.549	1495	7.74271	8.79718	1.69	37.8	11.0582	0.515881	3.1378	0.747666	24	0.000874639	22.4058	8.33794	5.31305	7.60885	0.534822	8.47999	32.8495	18.6522	0.00506839	0.065293	345.846	0.7536		Canyon
126_3	42.1422	174.549	1495	7.74271	8.79718	1.69	37.8	11.0582	0.515881	3.1378	0.747666	24	0.000874639	22.4058	8.33794	5.31305	7.60885	0.534822	8.47999	32.8495	18.6522	0.00506839	0.065293	345.846	0.7536		Canyon
126_6	42.1422	174.549	1495	7.74271	8.79718	1.69	37.8	11.0582	0.515881	3.1378	0.747666	24	0.000874639	22.4058	8.33794	5.31305	7.60885	0.534822	8.47999	32.8495	18.6522	0.00506839	0.065293	345.846	0.7536		Canyon
127_3	42.1228	174.54	1177	3.69923	7.57607	1	13.2	9.43578	0.148754	2.26546	0.725978	109	0.00120246	7.16847	2.62717	2.30083	2.50548	1.38484	3.99352	11.838	9.85669	0.363316	0.647812	120.214	0.7746		Canyon
128_3	42.0485	174.7	1420	6.47215	7.53497	1.45	29.5	9.02343	0.243051	2.48304	0.717416	10	0.00592732	36.2217	16.3518	10.7188	3.14174	3.59499	14.175	64.1472	37.2793	0.0462779	0.383125	2.43854	0.8035		Slope
129_6	42.1345	174.586	1456	7.36876	8.6285	1.59	23.8	9.52704	0.136025	2.43276	0.700152	15	0.000906765	35.1743	17.3474	12.411	2.02315	0.50215	19.3097	72.765	49.233	0.0980726	-0.015293	311.474	0.7536		Smt
130_4	42.1363	174.574	894	6.87404	5.38174	1.21	5.98	13.0317	0.466244	2.31739	0.830326	17	0.000398874	8.76907	2.50774	1.57523	4.44702	0.730826	2.16105	10.8558	6.14661	0.0542855	0.00664063	318.705	0.7536		Smt
132_1	42.1345	174.585	1453	7.36876	8.6285	1.59	32.4	9.52704	0.136025	2.43276	0.700152	16	0.000309229	33.0256	16.3805	11.7197	2.24802	0.282563	18.2467	66.3712	45.0863	-0.139896	-0.126953	301.606	0.7536		Smt

## Sheet: Bay of Plenty (BoP) 0-1cm
Sites	Nematoda	Nauplii	Copepoda	Ostracoda	Annelida	Kinorhyncha	Isopoda	Tanaidacea	Amphipoda	Cumacea	Aplacophora	Gastrotricha	Tardigrada	Loricifera		Habitat	Water_depth	Strata	Core
2_3	117	19	15	0	2	0	0	0	0	0	0	0	3	0		Slope	699	a	1
2_4	123	17	19	0	8	3	0	0	0	0	0	0	2	0		Slope	699	a	2
2_6	106	6	12	0	1	1	0	0	0	0	0	0	0	0		Slope	699	a	3
5_45	145	2	7	0	2	0	0	0	0	0	0	0	3	0		Slope	998	b	1
5_47	173	25	18	2	5	0	0	0	0	0	0	0	1	0		Slope	998	b	2
5_48	150	16	11	0	3	0	0	0	0	0	0	0	1	0		Slope	998	b	3
9_82	100	6	6	0	0	1	0	0	0	0	0	0	0	0		Slope	1193	c	1
9_85	76	7	14	1	2	0	0	0	0	0	0	0	0	1		Slope	1193	c	2
9_86	140	5	6	0	3	2	0	0	0	0	0	0	0	0		Slope	1193	c	3
13_102	113	10	12	0	2	3	0	0	0	0	0	0	0	0		Slope	1501	d	1
13_105	120	16	13	0	2	4	0	0	0	0	0	0	5	0		Slope	1501	d	2
13_106	83	7	14	0	0	0	0	0	0	0	0	0	0	2		Slope	1501	d	3
42_454	70	3	5	0	0	0	0	0	0	0	0	0	0	0		Slope	1501	d	1
42_451	173	11	10	0	2	0	0	0	1	0	0	0	1	0		Slope	1501	d	2
44_504	160	6	11	0	1	0	0	0	0	0	0	0	0	0		Slope	1202	c	1
44_502	164	4	11	1	0	4	0	0	1	0	0	0	1	0		Slope	1202	c	2
44_508	96	4	6	1	0	1	0	0	0	0	0	0	0	0		Slope	1202	c	3
49_535	301	20	20	2	4	3	0	0	0	0	0	0	0	0		Slope	1004	b	1
49_537	117	8	13	0	4	2	0	0	0	0	0	0	1	2		Slope	1004	b	2
49_538	243	13	16	1	2	2	0	0	0	0	0	0	1	0		Slope	1004	b	3
52_566	341	19	21	10	6	1	1	1	0	0	1	0	1	1		Slope	710	a	1
52_567	291	24	28	2	4	1	0	2	0	0	0	0	1	0		Slope	710	a	2
52_565	214	7	9	0	2	0	0	0	0	0	0	0	1	0		Slope	710	a	3
55_618	341	19	20	2	3	0	1	0	0	0	0	1	1	0		Canyon	705	a	1
55_614	201	4	7	0	2	0	0	0	0	0	0	0	0	0		Canyon	705	a	2
55_616	258	24	37	3	2	1	0	1	1	0	0	0	0	0		Canyon	705	a	3
60_661	101	10	13	0	4	0	2	0	0	0	0	0	0	0		Canyon	900	b	1
60_662	118	6	8	0	4	0	1	0	0	0	0	0	0	0		Canyon	900	b	2
61_666	255	13	21	2	3	1	0	1	0	0	0	0	0	1		Canyon	870	b	1
65_711	246	18	31	0	1	1	0	0	0	0	0	0	0	0		Canyon	1254	c	1
66_717	156	5	14	1	4	1	0	1	0	0	0	0	0	0		Canyon	1254	c	2
66_719	170	5	4	0	2	0	0	0	0	0	0	0	0	0		Canyon	1254	c	3
70_781	255	10	11	0	1	0	0	0	1	0	0	0	0	0		Canyon	1518	d	1
70_785	291	1	20	1	1	3	0	0	0	0	0	0	0	0		Canyon	1518	d	2
70_787	330	16	13	1	1	1	0	0	0	0	0	0	1	0		Canyon	1518	d	3
105_1281	214	8	4	0	4	0	0	0	0	0	0	0	0	0		Canyon	1486	d	1
105_1286	239	11	9	0	2	0	1	0	0	0	0	0	1	0		Canyon	1486	d	2
105_1287	145	12	15	0	2	2	0	0	0	0	0	0	1	0		Canyon	1486	d	3
111_1333	106	4	5	0	0	0	0	0	0	0	0	0	0	0		Canyon	1221	c	1
111_1334	127	10	7	2	0	5	0	0	0	0	0	0	0	0		Canyon	1221	c	2
113_1341	135	12	16	0	0	1	0	0	0	0	0	0	0	0		Canyon	1222	c	1
118_1386	158	19	12	1	3	0	0	1	0	0	0	0	1	0		Canyon	1083	b	1
118_1387	526	19	17	1	1	6	0	0	0	1	0	0	1	0		Canyon	1083	b	2
118_1388	260	25	29	1	3	0	0	0	1	0	0	0	3	0		Canyon	1083	b	3
125_1467	166	28	19	1	2	0	0	0	0	0	0	0	0	0		Canyon	697	a	1
125_1466	102	31	29	3	4	1	0	0	0	0	0	0	1	0		Canyon	697	a	2
125_1465	125	25	13	2	2	1	0	0	0	0	1	0	4	0		Canyon	697	a	3
135_1555	139	9	9	0	1	2	0	0	0	0	0	0	1	0		Canyon	1523	d	1
135_1554	61	5	0	0	1	0	0	0	0	0	0	0	1	0		Canyon	1523	d	2
135_1552	89	12	5	1	1	0	0	0	0	0	0	0	0	0		Canyon	1523	d	3
142_1591	161	6	9	1	8	0	0	0	0	0	0	0	1	0		Canyon	1200	c	1
143_1597	155	18	14	1	3	1	0	0	0	0	0	0	3	0		Canyon	1202	c	1
143_1596	320	19	13	0	0	0	2	0	0	0	0	0	3	0		Canyon	1202	c	2
150_1692	223	7	15	0	2	0	0	0	1	0	0	0	0	0		Canyon	1017	b	1
151_1696	183	13	13	0	4	0	1	0	0	0	0	0	0	0		Canyon	1023	b	1
152_1703	597	0	16	0	5	2	1	0	0	0	0	0	0	0		Canyon	1031	b	1
154_1733	92	9	10	0	2	0	0	1	0	0	0	0	1	0		Canyon	700	a	1
155_1736	112	12	20	0	3	0	1	0	0	0	0	0	0	0		Canyon	704	a	1
155_1738	168	30	29	0	3	4	0	0	0	0	0	0	3	0		Canyon	704	a	2
175_1987	156	17	11	1	1	0	0	0	0	0	0	0	0	0		Slope	1494	d	1
175_1983	257	27	21	4	1	2	0	0	0	0	0	0	0	0		Slope	1494	d	2
175_1981	259	22	28	2	3	2	0	2	1	0	0	0	1	0		Slope	1494	d	3
178_2026	145	11	14	0	2	0	0	0	0	0	0	0	0	0		Slope	1196	c	1
178_2025	262	8	16	0	0	0	0	1	0	0	0	0	0	0		Slope	1196	c	2
178_2027	123	11	22	1	5	0	0	0	0	0	0	0	1	0		Slope	1196	c	3
181_2054	100	5	5	0	3	3	1	0	0	0	0	0	0	0		Slope	998	b	1
181_2051	178	23	15	0	2	3	0	0	0	0	0	0	0	0		Slope	998	b	2
181_2055	237	16	19	0	2	1	0	0	0	0	0	0	0	0		Slope	998	b	3
185_2075	126	34	36	2	7	1	0	0	0	0	0	0	0	0		Slope	726	a	1
185_2074	169	20	46	0	2	6	1	1	0	0	0	0	3	0		Slope	726	a	2
185_2071	175	41	23	0	2	5	0	0	4	0	0	0	2	0		Slope	726	a	3

## Sheet: BoP 1-5cm
Sites	Nematoda	Nauplii	Copepoda	Ostracoda	Annelida	Kinorhyncha	Isopoda	Tanaidacea	Amphipoda	Cumacea	Aplacophora	Gastrotricha	Tardigrada	Loricifera		Habitat	Water_depth	Strata	Core
2_3	181	6	8	1	1	0	0	0	0	0	0	0	0	0		Slope	699	a	1
2_4	144	1	3	0	1	0	0	0	0	0	0	0	3	0		Slope	699	a	2
2_6	215	0	2	0	5	0	0	0	0	0	0	0	0	0		Slope	699	a	3
5_45	152	0	2	0	1	0	0	0	0	0	0	0	1	0		Slope	998	b	1
5_47	252	6	9	0	3	0	0	0	0	0	0	0	1	0		Slope	998	b	2
5_48	149	3	1	2	0	0	0	0	0	0	0	0	0	0		Slope	998	b	3
9_82	270	1	7	0	1	0	0	0	0	0	0	0	0	0		Slope	1193	c	1
9_85	204	3	10	0	0	0	0	0	0	0	0	0	0	0		Slope	1193	c	2
9_86	239	0	10	0	4	0	0	0	0	0	0	0	0	0		Slope	1193	c	3
13_102	238	2	1	0	0	0	0	0	0	0	0	0	0	0		Slope	1501	d	1
13_105	105	0	0	0	2	0	0	0	0	0	0	0	0	0		Slope	1501	d	2
13_106	150	2	3	0	1	2	0	0	0	0	0	0	0	0		Slope	1501	d	3
42_454	387	14	20	0	3	1	0	1	0	0	0	0	3	0		Slope	1501	d	1
42_451	125	1	5	0	1	0	0	0	0	0	0	0	0	0		Slope	1501	d	2
44_504	105	1	1	0	0	0	0	1	0	0	0	0	0	0		Slope	1202	c	1
44_502	168	0	2	0	3	0	0	0	0	0	0	0	0	0		Slope	1202	c	2
44_508	179	3	3	0	1	0	0	0	0	0	0	0	0	0		Slope	1202	c	3
49_535	108	0	1	0	1	0	0	0	0	0	0	0	0	0		Slope	1004	b	1
49_537	170	0	3	0	1	0	0	0	0	0	0	0	0	0		Slope	1004	b	2
49_538	174	0	5	0	3	0	0	0	0	0	0	0	0	0		Slope	1004	b	3
52_566	259	2	1	0	2	0	0	0	0	0	0	1	0	0		Slope	710	a	1
52_567	313	0	5	0	3	1	0	0	0	0	0	0	0	0		Slope	710	a	2
52_565	268	0	1	0	1	0	0	0	0	0	0	0	0	0		Slope	710	a	3
55_618	549	7	3	0	4	0	0	1	0	0	0	0	0	0		Canyon	705	a	1
55_614	198	1	6	0	1	0	0	0	0	0	0	0	0	0		Canyon	705	a	2
55_616	395	7	11	0	4	0	0	0	0	0	0	0	0	0		Canyon	705	a	3
60_661	156	4	5	0	1	0	0	0	0	0	0	0	0	0		Canyon	900	b	1
60_662	373	5	8	0	2	1	0	0	0	0	0	0	0	0		Canyon	900	b	2
61_666	397	5	4	0	2	0	0	0	0	0	0	0	0	0		Canyon	870	b	1
65_711	278	1	9	0	1	0	0	0	0	0	0	0	0	0		Canyon	1254	c	1
66_717	487	3	5	0	0	0	0	1	0	0	0	0	0	0		Canyon	1254	c	2
66_719	199	0	1	0	1	0	0	0	0	0	0	0	0	0		Canyon	1254	c	3
70_781	284	2	6	0	1	0	0	0	0	0	0	0	0	0		Canyon	1518	d	1
70_785	284	0	6	0	2	2	0	0	0	0	0	0	0	0		Canyon	1518	d	2
70_787	394	0	4	0	1	0	0	0	0	0	0	0	1	0		Canyon	1518	d	3
105_1281	234	2	0	0	4	0	0	0	0	0	0	0	0	0		Canyon	1486	d	1
105_1286	272	3	4	0	2	0	0	1	0	0	0	0	0	0		Canyon	1486	d	2
105_1287	246	1	4	1	2	0	0	1	0	0	0	0	0	0		Canyon	1486	d	3
111_1333	199	2	9	0	2	0	0	0	0	0	1	0	0	0		Canyon	1221	c	1
111_1334	413	0	5	0	0	0	1	0	0	0	0	0	1	0		Canyon	1221	c	2
113_1341	306	3	6	0	2	1	0	1	0	0	0	0	0	0		Canyon	1222	c	1
118_1386	406	5	14	0	1	1	1	0	0	0	0	0	1	0		Canyon	1083	b	1
118_1387	790	4	3	2	9	0	0	0	0	0	0	0	0	0		Canyon	1083	b	2
118_1388	660	4	12	1	4	1	0	3	0	0	0	0	0	0		Canyon	1083	b	3
125_1467	383	1	8	0	6	0	0	0	0	0	0	0	0	0		Canyon	697	a	1
125_1466	174	8	4	1	1	0	0	0	0	0	0	0	0	0		Canyon	697	a	2
125_1465	311	7	16	1	4	1	0	0	0	0	0	0	1	0		Canyon	697	a	3
135_1555	267	1	0	0	3	1	0	0	0	0	0	0	0	0		Canyon	1523	d	1
135_1554	220	0	1	0	3	0	0	2	0	0	0	0	0	0		Canyon	1523	d	2
135_1552	141	1	1	0	0	0	0	0	0	0	0	0	0	0		Canyon	1523	d	3
142_1591	195	2	6	0	6	0	0	0	0	0	0	0	0	0		Canyon	1200	c	1
143_1597	201	1	2	0	1	0	0	0	0	0	0	0	0	0		Canyon	1202	c	1
143_1596	117	0	1	0	1	0	0	0	0	0	0	0	0	0		Canyon	1202	c	2
150_1692	197	0	1	0	4	0	0	0	0	0	0	0	0	0		Canyon	1017	b	1
151_1696	237	3	2	0	3	0	0	0	0	0	0	0	0	0		Canyon	1023	b	1
152_1703	589	0	2	0	3	0	1	1	0	0	0	0	0	0		Canyon	1031	b	1
154_1733	112	11	17	1	3	3	1	0	0	0	0	0	1	0		Canyon	700	a	1
155_1736	143	1	1	0	4	0	0	0	0	0	0	0	0	0		Canyon	704	a	1
155_1738	252	3	4	0	0	0	0	0	0	0	0	0	0	0		Canyon	704	a	2
175_1987	365	9	9	0	2	0	0	0	0	0	0	0	0	0		Slope	1494	d	1
175_1983	334	2	6	0	4	0	0	1	0	0	0	0	0	0		Slope	1494	d	2
175_1981	292	3	9	0	1	0	0	1	0	0	0	0	0	0		Slope	1494	d	3
178_2026	191	5	4	0	2	0	0	0	0	0	0	0	0	0		Slope	1196	c	1
178_2025	158	30	42	1	1	4	0	1	0	0	0	1	0	0		Slope	1196	c	2
178_2027	180	2	8	0	1	0	0	0	0	0	0	0	0	0		Slope	1196	c	3
181_2054	229	1	5	1	1	0	0	0	0	0	0	0	0	0		Slope	998	b	1
181_2051	214	1	3	0	0	0	0	1	0	0	0	0	0	0		Slope	998	b	2
181_2055	174	1	7	1	1	1	0	0	0	0	0	0	0	0		Slope	998	b	3
185_2075	191	1	7	0	1	0	0	0	0	0	0	0	0	0		Slope	726	a	1
185_2074	266	5	4	0	2	0	0	0	0	0	0	0	0	0		Slope	726	a	2
185_2071	367	10	10	0	4	0	1	0	0	0	0	0	0	0		Slope	726	a	3

## Sheet: Envir. variables (BoP)
	Lat	Lon	Mean chlorophyll concentration (mg chlorophyll m-3)	Phaeo µg/g	POC %	%CaCO3	%TOM	Depth	Fishing effort (#tows)	SORTING	SKEWNESS	KURTOSIS	%MUD	vrm05_1	STD07_1	STD05_1	slope_STD07_1	slope_STD05_1	slope_1	Range07_1	Range05_1	profile_curvature_1	plan_curvature_1	aspect_1		Habitat	Strata
2_3	-37.1677	176.661	0.2969	1.51	0.49	13.19	3.458	695.5	3	5.61107	-0.146304	1.85498	0.508983	0.000182092	2.30243	1.65757	0.68193	0.675839	2.49442	8.95825	6.15485	0.0202917	-0.248009	292.317		Slope	700
2_4	-37.1677	176.661	0.2969	1.51	0.49	13.19	3.458	695.5	3	5.61107	-0.146304	1.85498	0.508983	0.000182092	2.30243	1.65757	0.68193	0.675839	2.49442	8.95825	6.15485	0.0202917	-0.248009	292.317		Slope	700
2_6	-37.1677	176.661	0.2969	1.51	0.49	13.19	3.458	695.5	3	5.61107	-0.146304	1.85498	0.508983	0.000182092	2.30243	1.65757	0.68193	0.675839	2.49442	8.95825	6.15485	0.0202917	-0.248009	292.317		Slope	700
5_45	-37.1088	176.737	0.2847	3.7	0.41	14.22	4.11002	1029.5	14	4.50531	-0.0940875	2.07478	0.56689	0.000228941	1.93508	1.46584	0.912327	0.889756	2.79693	7.54144	5.15265	-0.24676	0.296072	264.581		Slope	1000
5_47	-37.1088	176.737	0.2847	3.7	0.41	14.22	4.11002	1029.5	14	4.50531	-0.0940875	2.07478	0.56689	0.000228941	1.93508	1.46584	0.912327	0.889756	2.79693	7.54144	5.15265	-0.24676	0.296072	264.581		Slope	1000
5_48	-37.1088	176.737	0.2847	3.7	0.41	14.22	4.11002	1029.5	14	4.50531	-0.0940875	2.07478	0.56689	0.000228941	1.93508	1.46584	0.912327	0.889756	2.79693	7.54144	5.15265	-0.24676	0.296072	264.581		Slope	1000
9_82	-37.0586	176.813	0.2644	2.4	0.77	16.65	5.821	1207.5	0	3.34458	0.459068	2.49913	0.846615	0.000226498	1.60212	1.15434	0.726507	0.634928	2.30977	7.53198	4.35608	0.148821	0.160071	206.38		Slope	1200
9_85	-37.0586	176.813	0.2644	2.4	0.77	16.65	5.821	1207.5	0	3.34458	0.459068	2.49913	0.846615	0.000226498	1.60212	1.15434	0.726507	0.634928	2.30977	7.53198	4.35608	0.148821	0.160071	206.38		Slope	1200
9_86	-37.0586	176.813	0.2644	2.4	0.77	16.65	5.821	1207.5	0	3.34458	0.459068	2.49913	0.846615	0.000226498	1.60212	1.15434	0.726507	0.634928	2.30977	7.53198	4.35608	0.148821	0.160071	206.38		Slope	1200
13_102	-36.9227	176.979	0.2563	1.85	0.47	19.54	4.026	1489.5	0	3.53212	0.104018	2.048	0.758747	0.000181913	0.741755	0.423867	1.99586	0.595666	0.526069	4.16699	1.83801	0.0479629	-0.0581308	177.848		Slope	1500
13_105	-36.9227	176.979	0.2563	1.85	0.47	19.54	4.026	1489.5	0	3.53212	0.104018	2.048	0.758747	0.000181913	0.741755	0.423867	1.99586	0.595666	0.526069	4.16699	1.83801	0.0479629	-0.0581308	177.848		Slope	1500
13_106	-36.9227	176.979	0.2563	1.85	0.47	19.54	4.026	1489.5	0	3.53212	0.104018	2.048	0.758747	0.000181913	0.741755	0.423867	1.99586	0.595666	0.526069	4.16699	1.83801	0.0479629	-0.0581308	177.848		Slope	1500
42_454	-37.2405	177.636	0.2709	3.24	0.77	11.8	5.058	1499.5	0	3.24179	0.402132	2.5633	0.865794	0.000281692	1.60778	1.39507	0.958457	0.867031	2.88485	6.04797	5.04504	-0.0136963	0.147593	141.695		Slope	1500
42_451	-37.2405	177.636	0.2709	3.24	0.77	11.8	5.058	1499.5	0	3.24179	0.402132	2.5633	0.865794	0.000281692	1.60778	1.39507	0.958457	0.867031	2.88485	6.04797	5.04504	-0.0136963	0.147593	141.695		Slope	1500
44_504	-37.3675	177.63	0.3333	1.42	0.29	6.15	3.013	1192.5	0	5.07024	-0.481323	2.2642	0.371363	0.000136256	1.59593	1.29226	0.758683	0.447672	2.49441	7.64478	4.81458	0.30291	-0.211914	150.067		Slope	1200
44_502	-37.3675	177.63	0.3333	1.42	0.29	6.15	3.013	1192.5	0	5.07024	-0.481323	2.2642	0.371363	0.000136256	1.59593	1.29226	0.758683	0.447672	2.49441	7.64478	4.81458	0.30291	-0.211914	150.067		Slope	1200
44_508	-37.3675	177.63	0.3333	1.42	0.29	6.15	3.013	1192.5	0	5.07024	-0.481323	2.2642	0.371363	0.000136256	1.59593	1.29226	0.758683	0.447672	2.49441	7.64478	4.81458	0.30291	-0.211914	150.067		Slope	1200
49_535	-37.4317	177.626	0.385	4.84	0.64	6.13	3.029	1004	2	3.53761	-0.0384641	2.07222	0.770574	0.000274658	2.55855	2.2203	1.1464	1.12792	1.90297	10.1085	9.02533	-0.0571605	0.378289	154.878		Slope	1000
49_537	-37.4317	177.626	0.385	4.84	0.64	6.13	3.029	1004	2	3.53761	-0.0384641	2.07222	0.770574	0.000274658	2.55855	2.2203	1.1464	1.12792	1.90297	10.1085	9.02533	-0.0571605	0.378289	154.878		Slope	1000
49_538	-37.4317	177.626	0.385	4.84	0.64	6.13	3.029	1004	2	3.53761	-0.0384641	2.07222	0.770574	0.000274658	2.55855	2.2203	1.1464	1.12792	1.90297	10.1085	9.02533	-0.0571605	0.378289	154.878		Slope	1000
52_566	-37.5043	177.62	0.4821	3.14	0.57	3.68	3.823	710	0	4.39152	0.327151	2.47548	0.72041	0.00346446	4.92991	2.90453	4.62758	2.90906	4.70394	23.2662	10.6776	0.432169	-0.303271	199.128		Slope	700
52_567	-37.5043	177.62	0.4821	3.14	0.57	3.68	3.823	710	0	4.39152	0.327151	2.47548	0.72041	0.00346446	4.92991	2.90453	4.62758	2.90906	4.70394	23.2662	10.6776	0.432169	-0.303271	199.128		Slope	700
52_565	-37.5043	177.62	0.4821	3.14	0.57	3.68	3.823	710	0	4.39152	0.327151	2.47548	0.72041	0.00346446	4.92991	2.90453	4.62758	2.90906	4.70394	23.2662	10.6776	0.432169	-0.303271	199.128		Slope	700
55_618	-37.4308	177.893	0.4827	5.13	0.41	6.18	3.127	721	0	4.68524	0.282648	2.46558	0.683323	0.00139147	2.88116	1.65734	3.42247	2.1441	1.62958	14.853	6.78101	0.0188597	-0.0350759	346.047		Canyon	700
55_614	-37.4308	177.893	0.4827	5.13	0.41	6.18	3.127	721	0	4.68524	0.282648	2.46558	0.683323	0.00139147	2.88116	1.65734	3.42247	2.1441	1.62958	14.853	6.78101	0.0188597	-0.0350759	346.047		Canyon	700
55_616	-37.4308	177.893	0.4827	5.13	0.41	6.18	3.127	721	0	4.68524	0.282648	2.46558	0.683323	0.00139147	2.88116	1.65734	3.42247	2.1441	1.62958	14.853	6.78101	0.0188597	-0.0350759	346.047		Canyon	700
60_661	-37.4028	177.873	0.357	3.93	0.7	5.13	3.718	1016.5	0	3.49642	0.141618	2.08064	0.807868	0.0192609	25.7927	20.3765	11.2808	9.9755	25.8128	82.96	70.477	0.132741	-2.20357	237.916		Canyon	1000
60_662	-37.4028	177.873	0.357	3.93	0.7	5.13	3.718	1016.5	0	3.49642	0.141618	2.08064	0.807868	0.0192609	25.7927	20.3765	11.2808	9.9755	25.8128	82.96	70.477	0.132741	-2.20357	237.916		Canyon	1000
61_666	-37.403	177.878	0.357	3.93	0.7	5.13	3.718	881	0	3.49642	0.141618	2.08064	0.807868	0.00323462	23.4619	16.0798	4.82688	3.09258	23.1898	87.237	53.544	-0.621461	0.418549	112.306		Canyon	1000
65_711	-37.3643	177.876	0.357	2.86	0.46	4.45	2.533	1254	0	5.43498	-0.0218179	1.88926	0.546973	0.000108361	2.89377	2.03774	0.462751	0.289469	3.21991	10.994	6.96802	0.0126649	0.0533094	152.587		Canyon	1200
66_717	-37.3643	177.876	0.357	2.86	0.46	4.45	2.533	1254	0	5.43498	-0.0218179	1.88926	0.546973	0.000108361	2.89377	2.03774	0.462751	0.289469	3.21991	10.994	6.96802	0.0126649	0.0533094	152.587		Canyon	1200
66_719	-37.3643	177.876	0.357	2.86	0.46	4.45	2.533	1254	0	5.43498	-0.0218179	1.88926	0.546973	0.000108361	2.89377	2.03774	0.462751	0.289469	3.21991	10.994	6.96802	0.0126649	0.0533094	152.587		Canyon	1200
70_781	-37.3018	177.871	0.2976	4.27	0.93	5.99	3.567	1520	0	3.77839	0.202373	2.01689	0.74991	0.0023365	3.7902	2.01129	4.77974	3.51369	0.446879	16.944	7.72803	0.255899	-0.114999	135.266		Canyon	1500
70_785	-37.3018	177.871	0.2976	4.27	0.93	5.99	3.567	1520	0	3.77839	0.202373	2.01689	0.74991	0.0023365	3.7902	2.01129	4.77974	3.51369	0.446879	16.944	7.72803	0.255899	-0.114999	135.266		Canyon	1500
70_787	-37.3018	177.871	0.2976	4.27	0.93	5.99	3.567	1520	0	3.77839	0.202373	2.01689	0.74991	0.0023365	3.7902	2.01129	4.77974	3.51369	0.446879	16.944	7.72803	0.255899	-0.114999	135.266		Canyon	1500
105_1281	-37.1893	176.944	0.2781	1.83	0.71	11.87	3.953	1468	1	5.56206	-0.133446	1.89593	0.485498	0.00268531	9.84422	6.37005	4.1159	3.91134	8.66536	34.6649	21.5991	0.0637934	0.123872	70.7898		Canyon	1500
105_1286	-37.1893	176.944	0.2781	1.83	0.71	11.87	3.953	1468	1	5.56206	-0.133446	1.89593	0.485498	0.00268531	9.84422	6.37005	4.1159	3.91134	8.66536	34.6649	21.5991	0.0637934	0.123872	70.7898		Canyon	1500
105_1287	-37.1893	176.944	0.2781	1.83	0.71	11.87	3.953	1468	1	5.56206	-0.133446	1.89593	0.485498	0.00268531	9.84422	6.37005	4.1159	3.91134	8.66536	34.6649	21.5991	0.0637934	0.123872	70.7898		Canyon	1500
111_1333	-37.251	176.966	0.2945	3.93	1.19	12.43	5.714	1222	0	3.30104	0.465654	2.50059	0.848391	0.0164331	16.7389	9.6135	11.3802	10.1981	8.11729	59.9019	30.4377	0.483984	-0.0777344	258.831		Canyon	1200
111_1334	-37.251	176.966	0.2945	3.93	1.19	12.43	5.714	1222	0	3.30104	0.465654	2.50059	0.848391	0.0164331	16.7389	9.6135	11.3802	10.1981	8.11729	59.9019	30.4377	0.483984	-0.0777344	258.831		Canyon	1200
113_1341	-37.251	176.966	0.2945	3.93	1.19	12.43	5.714	1222	0	3.30104	0.465654	2.50059	0.848391	0.0164331	16.7389	9.6135	11.3802	10.1981	8.11729	59.9019	30.4377	0.483984	-0.0777344	258.831		Canyon	1200
118_1386	-37.3335	176.962	0.3272	5.15	1.27	13.16	5.399	1084	1	2.5355	0.402862	2.97853	0.956835	0.000660002	1.92076	1.00472	2.41847	1.58694	0.702064	10.0275	4.36523	0.186748	0.0751854	152.864		Canyon	1000
118_1387	-37.3335	176.962	0.3272	5.15	1.27	13.16	5.399	1084	1	2.5355	0.402862	2.97853	0.956835	0.000660002	1.92076	1.00472	2.41847	1.58694	0.702064	10.0275	4.36523	0.186748	0.0751854	152.864		Canyon	1000
118_1388	-37.3335	176.962	0.3272	5.15	1.27	13.16	5.399	1084	1	2.5355	0.402862	2.97853	0.956835	0.000660002	1.92076	1.00472	2.41847	1.58694	0.702064	10.0275	4.36523	0.186748	0.0751854	152.864		Canyon	1000
125_1467	-37.4745	176.758	0.3649	5.09	0.52	10.26	8.762	696	0	2.38014	0.322328	2.9567	0.973323	0.000153899	1.83485	1.2355	0.826128	0.745191	1.32623	7.22491	4.86853	0.0592501	0.140627	279.769		Canyon	700
125_1466	-37.4745	176.758	0.3649	5.09	0.52	10.26	8.762	696	0	2.38014	0.322328	2.9567	0.973323	0.000153899	1.83485	1.2355	0.826128	0.745191	1.32623	7.22491	4.86853	0.0592501	0.140627	279.769		Canyon	700
125_1465	-37.4745	176.758	0.3649	5.09	0.52	10.26	8.762	696	0	2.38014	0.322328	2.9567	0.973323	0.000153899	1.83485	1.2355	0.826128	0.745191	1.32623	7.22491	4.86853	0.0592501	0.140627	279.769		Canyon	700
135_1555	-37.4438	177.352	0.3569	2.67	0.19	3.73	4.745	1524	1	3.33639	0.333458	2.34136	0.819859	0.00111288	1.65811	1.85892	1.18196	1.12498	3.65453	6.44861	6.44861	0.0772708	-0.820952	309.611		Canyon	1500
135_1554	-37.4438	177.352	0.3569	2.67	0.19	3.73	4.745	1524	1	3.33639	0.333458	2.34136	0.819859	0.00111288	1.65811	1.85892	1.18196	1.12498	3.65453	6.44861	6.44861	0.0772708	-0.820952	309.611		Canyon	1500
135_1552	-37.4438	177.352	0.3569	2.67	0.19	3.73	4.745	1524	1	3.33639	0.333458	2.34136	0.819859	0.00111288	1.65811	1.85892	1.18196	1.12498	3.65453	6.44861	6.44861	0.0772708	-0.820952	309.611		Canyon	1500
142_1591	-37.5292	177.295	0.4253	2.17	0.43	0.38	2.113	1200	1	6.64577	-0.396527	1.69234	0.421424	0.00618327	6.96155	4.75723	3.61341	3.74815	7.4637	31.0906	19.3242	-0.369623	-0.777436	226.763		Canyon	1200
143_1597	-37.5295	177.295	0.4253	2.17	0.43	0.38	2.113	1202	1	6.64577	-0.396527	1.69234	0.421424	0.00678658	8.17878	6.37317	4.12776	3.34035	4.76457	36.6385	26.0787	-1.14012	-0.0829163	211.87		Canyon	1200
143_1596	-37.5295	177.295	0.4253	2.17	0.43	0.38	2.113	1202	1	6.64577	-0.396527	1.69234	0.421424	0.00678658	8.17878	6.37317	4.12776	3.34035	4.76457	36.6385	26.0787	-1.14012	-0.0829163	211.87		Canyon	1200
150_1692	-37.5513	177.285	0.4117	3.13	0.85	0	2.13	926	1	5.76179	-0.576776	2.19865	0.331068	0.0133549	20.5628	14.4296	3.52255	2.23687	25.8612	79.2037	49.6123	-1.11278	0.0645761	193.531		Canyon	1000
151_1696	-37.5528	177.268	0.4117	3.13	0.85	0	2.13	1031	1	5.76179	-0.576776	2.19865	0.331068	0.000804901	2.81807	1.9973	1.59773	1.56688	2.15434	12.2167	8.32166	0.116051	-0.0168979	195.59		Canyon	1000
152_1703	-37.5528	177.268	0.4117	3.13	0.85	0	2.13	1031	1	5.76179	-0.576776	2.19865	0.331068	0.000804901	2.81807	1.9973	1.59773	1.56688	2.15434	12.2167	8.32166	0.116051	-0.0168979	195.59		Canyon	1000
154_1733	-37.6175	177.225	0.5043	6.04	0.6	1.64	3.852	702	0	4.40491	0.56915	2.73423	0.783461	0.000734568	2.07265	1.34513	3.14256	1.25828	1.78145	8.44678	4.80066	0.334982	-0.227703	155.031		Canyon	700
155_1736	-37.6175	177.225	0.5043	6.04	0.6	1.64	3.852	702	0	4.40491	0.56915	2.73423	0.783461	0.000734568	2.07265	1.34513	3.14256	1.25828	1.78145	8.44678	4.80066	0.334982	-0.227703	155.031		Canyon	700
155_1738	-37.6175	177.225	0.5043	6.04	0.6	1.64	3.852	702	0	4.40491	0.56915	2.73423	0.783461	0.000734568	2.07265	1.34513	3.14256	1.25828	1.78145	8.44678	4.80066	0.334982	-0.227703	155.031		Canyon	700
175_1987	-37.2605	178.014	0.295	1.91	0.53	5.38	4.483	1518.5	0	2.6933	0.0599691	2.38476	0.946844	0.0114518	13.3392	11.4166	8.43071	8.38034	15.5789	39.0299	35.801	0.659992	0.586847	215.654		Slope	1500
175_1983	-37.2605	178.014	0.295	1.91	0.53	5.38	4.483	1518.5	0	2.6933	0.0599691	2.38476	0.946844	0.0114518	13.3392	11.4166	8.43071	8.38034	15.5789	39.0299	35.801	0.659992	0.586847	215.654		Slope	1500
175_1981	-37.2605	178.014	0.295	1.91	0.53	5.38	4.483	1518.5	0	2.6933	0.0599691	2.38476	0.946844	0.0114518	13.3392	11.4166	8.43071	8.38034	15.5789	39.0299	35.801	0.659992	0.586847	215.654		Slope	1500
178_2026	-37.317	178.027	0.295	1.74	0.5	5.48	2.962	1191	0	4.19538	0.37053	2.48688	0.759064	0.000141382	4.26449	3.11624	0.972973	0.663609	5.55101	15.334	10.676	-0.292429	0.131595	145.319		Slope	1200
178_2025	-37.317	178.027	0.295	1.74	0.5	5.48	2.962	1191	0	4.19538	0.37053	2.48688	0.759064	0.000141382	4.26449	3.11624	0.972973	0.663609	5.55101	15.334	10.676	-0.292429	0.131595	145.319		Slope	1200
178_2027	-37.317	178.027	0.295	1.74	0.5	5.48	2.962	1191	0	4.19538	0.37053	2.48688	0.759064	0.000141382	4.26449	3.11624	0.972973	0.663609	5.55101	15.334	10.676	-0.292429	0.131595	145.319		Slope	1200
181_2054	-37.3417	178.033	0.357	1.44	0.95	6.04	2.457	1000	0	4.65265	0.103318	2.06817	0.666946	0.000909507	7.36296	4.82425	1.91402	2.07012	6.2785	26.948	17.362	-0.105803	0.191775	203.806		Slope	1000
181_2051	-37.3417	178.033	0.357	1.44	0.95	6.04	2.457	1000	0	4.65265	0.103318	2.06817	0.666946	0.000909507	7.36296	4.82425	1.91402	2.07012	6.2785	26.948	17.362	-0.105803	0.191775	203.806		Slope	1000
181_2055	-37.3417	178.033	0.357	1.44	0.95	6.04	2.457	1000	0	4.65265	0.103318	2.06817	0.666946	0.000909507	7.36296	4.82425	1.91402	2.07012	6.2785	26.948	17.362	-0.105803	0.191775	203.806		Slope	1000
185_2075	-37.3807	178.032	0.357	5.79	0.29	2.96	4.378	726	1	2.85045	0.0632948	2.2514	0.934517	6.61612e-05	3.11878	2.23279	0.655808	0.459974	3.58429	10.815	8.11298	-0.0380576	0.106728	192.329		Slope	700
185_2074	-37.3807	178.032	0.357	5.79	0.29	2.96	4.378	726	1	2.85045	0.0632948	2.2514	0.934517	6.61612e-05	3.11878	2.23279	0.655808	0.459974	3.58429	10.815	8.11298	-0.0380576	0.106728	192.329		Slope	700
185_2071	-37.3807	178.032	0.357	5.79	0.29	2.96	4.378	726	1	2.85045	0.0632948	2.2514	0.934517	6.61612e-05	3.11878	2.23279	0.655808	0.459974	3.58429	10.815	8.11298	-0.0380576	0.106728	192.329		Slope	700
